# Supplementary material for: Olfactory ensheathing cells from adult female rats are hybrid glia that promote neural repair
Source: eLife. 2025 Apr 29;13:RP95629. doi: 10.7554/eLife.95629 (PMC12040321; doi:10.7554/eLife.95629)
Supplement: Supplementary file 1. — The list of genes that are significantly enriched in each major cell type (fibroblast, microglia, or OEC) based on single-cell RNA-sequencing of immunopurified OECs and ‘leftover’ control cultures. For each gene, the table shows the nominal p-value, the multiple-testing adjusted p-value, the log2 fold change (relative to all other cell types), and the percentage of cells expressing that gene within the indicated cell type versus all other cell types. Genes are grouped by the cell type in which they are most significantly enriched. [file elife-95629-supp1.xlsx]

## Sheet: Sheet1
Gene	P_value	Adjusted_P_value	Log2 fold change	Cell type	Percentage of cells expressing the gene in the cell type	Percentage of cells expressing the gene in all the other cell types
Mgp	0	0	4.34163	Fibroblast	0.906	0.259
Tpm2	0	0	4.07727	Fibroblast	0.99	0.429
Igfbp2	0	0	4.07101	Fibroblast	0.751	0.077
Acta2	0	0	3.88194	Fibroblast	0.882	0.231
Col3a1	0	0	3.83924	Fibroblast	0.966	0.143
Myl9	0	0	3.6981	Fibroblast	0.962	0.213
Ifitm3	0	0	3.48413	Fibroblast	0.977	0.174
Tagln	0	0	3.44276	Fibroblast	0.994	0.787
S100a6	0	0	3.1129	Fibroblast	0.986	0.68
Bgn	0	0	2.95573	Fibroblast	0.968	0.346
Lox	0	0	2.91407	Fibroblast	0.861	0.095
Abi3bp	0	0	2.68081	Fibroblast	0.701	0.027
Cnn1	0	0	2.6002	Fibroblast	0.778	0.09
Col8a1	0	0	2.57175	Fibroblast	0.848	0.122
Tpm1	0	0	2.57025	Fibroblast	0.995	0.746
Rbp1	0	0	2.56527	Fibroblast	0.78	0.1
Fhl1	0	0	2.37577	Fibroblast	0.726	0.082
Cavin2	0	0	2.34846	Fibroblast	0.698	0.039
Fn1	0	0	2.22459	Fibroblast	0.967	0.574
Akap12	0	0	2.2184	Fibroblast	0.884	0.432
Actg2	0	0	2.21778	Fibroblast	0.364	0.048
Anxa1	0	0	2.20837	Fibroblast	0.9	0.25
Vcl	0	0	2.20604	Fibroblast	0.846	0.356
Ifitm1	0	0	2.18881	Fibroblast	0.723	0.07
Pcolce	0	0	2.16797	Fibroblast	0.799	0.109
Plac9	0	0	2.10353	Fibroblast	0.595	0.04
Tfap2b	0	0	2.07887	Fibroblast	0.737	0.049
Barx1	0	0	2.07809	Fibroblast	0.619	0.031
Cdh11	0	0	2.07434	Fibroblast	0.775	0.092
Pdlim1	0	0	2.0697	Fibroblast	0.739	0.139
Aqp1	0	0	2.05912	Fibroblast	0.471	0.032
Sdc2	0	0	2.04293	Fibroblast	0.823	0.349
Cald1	0	0	2.00021	Fibroblast	0.996	0.8
Car3	0	0	1.96174	Fibroblast	0.388	0.152
Clu	0	0	1.94851	Fibroblast	0.575	0.058
Actn1	0	0	1.91974	Fibroblast	0.781	0.27
Lgals1	0	0	1.90047	Fibroblast	0.986	0.647
Fos	0	0	1.8984	Fibroblast	0.916	0.419
Gja1	0	0	1.88574	Fibroblast	0.638	0.134
Fosb	0	0	1.88505	Fibroblast	0.619	0.111
Fstl1	0	0	1.87863	Fibroblast	0.964	0.59
Plpp3	0	0	1.87593	Fibroblast	0.675	0.073
Egr1	0	0	1.8494	Fibroblast	0.784	0.156
Mfge8	0	0	1.84685	Fibroblast	0.684	0.092
Pdgfrb	0	0	1.7805	Fibroblast	0.639	0.057
Fat1	0	0	1.78049	Fibroblast	0.751	0.218
Cav1	0	0	1.77317	Fibroblast	0.643	0.076
Sept4	0	0	1.76825	Fibroblast	0.609	0.039
Ifitm2	0	0	1.74879	Fibroblast	0.916	0.489
Foxc1	0	0	1.72855	Fibroblast	0.651	0.041
Ogn	0	0	1.69738	Fibroblast	0.522	0.022
Nkain4	0	0	1.68376	Fibroblast	0.686	0.174
Cavin1	0	0	1.6783	Fibroblast	0.753	0.267
Lmod1	0	0	1.67823	Fibroblast	0.54	0.029
Itgbl1	0	0	1.67311	Fibroblast	0.598	0.023
Cemip	0	0	1.67017	Fibroblast	0.428	0.034
Lhfpl6	0	0	1.64384	Fibroblast	0.796	0.317
Prrx2	0	0	1.63018	Fibroblast	0.58	0.039
Fbn1	0	0	1.60484	Fibroblast	0.54	0.052
Dusp1	0	0	1.59086	Fibroblast	0.753	0.178
Grem1	0	0	1.55928	Fibroblast	0.257	0.023
Nr2f2	0	0	1.55751	Fibroblast	0.673	0.151
F3	0	0	1.5489	Fibroblast	0.498	0.052
Pawr	0	0	1.54161	Fibroblast	0.595	0.031
Nid1	0	0	1.54129	Fibroblast	0.878	0.441
Hspb1	0	0	1.53621	Fibroblast	0.812	0.348
Nexn	0	0	1.52875	Fibroblast	0.546	0.049
Ccn3	0	0	1.51625	Fibroblast	0.653	0.195
AC108574.1	0	0	1.50943	Fibroblast	0.598	0.118
Tnnt2	0	0	1.50873	Fibroblast	0.419	0.027
Junb	0	0	1.50393	Fibroblast	0.846	0.334
Flna	0	0	1.49934	Fibroblast	0.892	0.569
Wls	0	0	1.4929	Fibroblast	0.656	0.128
Col1a1	0	0	1.48937	Fibroblast	0.99	0.788
RGD1559896	0	0	1.4876	Fibroblast	0.605	0.108
Spp1	0	0	1.48299	Fibroblast	0.494	0.139
Dstn	0	0	1.47615	Fibroblast	0.988	0.879
Filip1l	0	0	1.46698	Fibroblast	0.705	0.257
Rgs4	0	0	1.4577	Fibroblast	0.412	0.077
Ifi27	0	0	1.44815	Fibroblast	0.887	0.473
Cavin3	0	0	1.44522	Fibroblast	0.838	0.381
Ccn1	0	0	1.4377	Fibroblast	0.752	0.349
Wfdc1	0	0	1.432	Fibroblast	0.265	0.017
Col15a1	0	0	1.40738	Fibroblast	0.377	0.057
NEWGENE-1308171	0	0	1.40625	Fibroblast	0.448	0.014
Timp1	0	0	1.40606	Fibroblast	0.928	0.628
Itga8	0	0	1.38631	Fibroblast	0.475	0.034
Ptprd	0	0	1.38612	Fibroblast	0.499	0.022
Plod2	0	0	1.3715	Fibroblast	0.583	0.085
Macf1	0	0	1.35304	Fibroblast	0.776	0.34
Actn4	0	0	1.35225	Fibroblast	0.871	0.583
Igfbp4	0	0	1.33793	Fibroblast	0.414	0.057
Uaca	0	0	1.33769	Fibroblast	0.503	0.103
Mustn1	0	0	1.31817	Fibroblast	0.411	0.024
Loxl1	0	0	1.31203	Fibroblast	0.638	0.2
Penk	0	0	1.28994	Fibroblast	0.415	0.137
Sept7	0	0	1.27746	Fibroblast	0.965	0.748
Col6a2	0	0	1.2757	Fibroblast	0.406	0.035
Pam	0	0	1.26746	Fibroblast	0.616	0.235
RGD1564664	0	0	1.26065	Fibroblast	0.324	0.016
Bex3	0	0	1.25234	Fibroblast	0.626	0.255
Man2a1	0	0	1.24968	Fibroblast	0.568	0.1
Mrvi1	0	0	1.24355	Fibroblast	0.482	0.023
Ppp1r14a	0	0	1.24029	Fibroblast	0.279	0.03
Htra1	0	0	1.232	Fibroblast	0.719	0.344
Timp2	0	0	1.21627	Fibroblast	0.92	0.481
Id3	0	0	1.21196	Fibroblast	0.883	0.589
Actb	0	0	1.20353	Fibroblast	0.991	0.964
Nbl1	0	0	1.20128	Fibroblast	0.513	0.085
Tgfb3	0	0	1.19572	Fibroblast	0.381	0.07
Ppic	0	0	1.19235	Fibroblast	0.757	0.376
Ltbp2	0	0	1.18324	Fibroblast	0.483	0.089
Amotl2	0	0	1.16649	Fibroblast	0.62	0.302
Foxd1	0	0	1.1622	Fibroblast	0.407	0.016
C1r	0	0	1.14928	Fibroblast	0.471	0.061
Mgst2	0	0	1.13859	Fibroblast	0.485	0.099
Clec2g	0	0	1.13634	Fibroblast	0.518	0.075
Lamb1	0	0	1.13465	Fibroblast	0.487	0.077
Myadm	0	0	1.13123	Fibroblast	0.469	0.035
Btg2	0	0	1.12219	Fibroblast	0.55	0.196
Nrp1	0	0	1.113	Fibroblast	0.414	0.073
Pros1	0	0	1.10755	Fibroblast	0.622	0.243
Ext1	0	0	1.10607	Fibroblast	0.549	0.14
Parva	0	0	1.09931	Fibroblast	0.654	0.256
Ctsk	0	0	1.09479	Fibroblast	0.399	0.072
Rspo1	0	0	1.0925	Fibroblast	0.399	0.03
Tmem47	0	0	1.08956	Fibroblast	0.646	0.279
Ccn2	0	0	1.08668	Fibroblast	0.858	0.494
Itgb1	0	0	1.08111	Fibroblast	0.958	0.782
Runx1t1	0	0	1.0792	Fibroblast	0.428	0.017
Spsb1	0	0	1.07766	Fibroblast	0.5	0.094
LOC100911295	0	0	1.06849	Fibroblast	0.838	0.513
Pls3	0	0	1.06837	Fibroblast	0.586	0.218
Tceal9	0	0	1.06774	Fibroblast	0.719	0.428
Lmcd1	0	0	1.06498	Fibroblast	0.321	0.013
Aldh1a2	0	0	1.06353	Fibroblast	0.36	0.017
Gpc4	0	0	1.06329	Fibroblast	0.579	0.199
Slfn5	0	0	1.05988	Fibroblast	0.403	0.024
Crim1	0	0	1.0558	Fibroblast	0.416	0.032
Gas6	0	0	1.04417	Fibroblast	0.691	0.386
AABR07025295.1	0	0	1.04412	Fibroblast	0.615	0.243
P4ha1	0	0	1.04262	Fibroblast	0.791	0.47
Phldb2	0	0	1.04251	Fibroblast	0.485	0.1
Cpq	0	0	1.04129	Fibroblast	0.579	0.226
Pdlim2	0	0	1.03831	Fibroblast	0.461	0.059
Osr1	0	0	1.03724	Fibroblast	0.376	0.016
Tm4sf1	0	0	1.03696	Fibroblast	0.318	0.018
Col4a5	0	0	1.02822	Fibroblast	0.467	0.087
Myl6	0	0	1.02551	Fibroblast	0.998	0.981
Pla2g16	0	0	1.02502	Fibroblast	0.599	0.269
Ehd2	0	0	1.02381	Fibroblast	0.419	0.034
Dmpk	0	0	1.01665	Fibroblast	0.465	0.11
Ccdc80	0	0	1.01567	Fibroblast	0.874	0.415
Serpinh1	0	0	1.00767	Fibroblast	0.921	0.639
LOC103689983	0	0	1.00105	Fibroblast	0.595	0.281
C1qa	0	0	5.67359	Microglia	0.992	0.06
C1qb	0	0	5.4499	Microglia	0.991	0.058
Tyrobp	0	0	5.19967	Microglia	0.984	0.061
Apoe	0	0	5.19183	Microglia	0.986	0.502
C1qc	0	0	4.9079	Microglia	0.98	0.037
Fcer1g	0	0	4.80927	Microglia	0.971	0.043
Aif1	0	0	4.72032	Microglia	0.973	0.046
Tmem176b	0	0	4.21489	Microglia	0.938	0.049
Tmem176a	0	0	4.11048	Microglia	0.904	0.034
Ctsb	0	0	3.89872	Microglia	0.982	0.623
Ctsz	0	0	3.82942	Microglia	0.961	0.221
Pf4	0	0	3.82823	Microglia	0.776	0.017
Lyz2	0	0	3.6827	Microglia	0.728	0.02
Gpnmb	0	0	3.58921	Microglia	0.744	0.054
Cd68	0	0	3.3983	Microglia	0.851	0.02
Trem2	0	0	3.39596	Microglia	0.832	0.016
Cst3	0	0	3.38658	Microglia	0.973	0.772
Ifi30	0	0	3.3575	Microglia	0.927	0.293
Csf1r	0	0	3.32248	Microglia	0.855	0.018
Anxa3	0	0	3.24694	Microglia	0.924	0.314
Ctsd	0	0	3.22603	Microglia	0.961	0.633
Pltp	0	0	3.13674	Microglia	0.762	0.058
Rgs10	0	0	3.10245	Microglia	0.825	0.13
Laptm5	0	0	3.01913	Microglia	0.801	0.018
Rnaset2	0	0	3.01086	Microglia	0.947	0.519
Lgmn	0	0	2.91886	Microglia	0.878	0.313
Cfh	0	0	2.83802	Microglia	0.84	0.106
Folr2	0	0	2.80232	Microglia	0.67	0.01
Grn	0	0	2.78122	Microglia	0.95	0.605
Arhgdib	0	0	2.72406	Microglia	0.768	0.067
Npc2	0	0	2.47988	Microglia	0.969	0.805
Coro1a	0	0	2.47162	Microglia	0.642	0.018
Fcgr3a	0	0	2.41991	Microglia	0.623	0.01
Sat1	0	0	2.35056	Microglia	0.853	0.417
Pld4	0	0	2.34208	Microglia	0.607	0.01
Tf	0	0	2.32448	Microglia	0.558	0.092
Gmfg	0	0	2.30529	Microglia	0.771	0.216
Cxcl2	0	0	2.29715	Microglia	0.332	0.005
Adgre1	0	0	2.29505	Microglia	0.601	0.009
Creg1	0	0	2.2823	Microglia	0.621	0.03
Ccl3	0	0	2.27311	Microglia	0.479	0.01
Gngt2	0	0	2.24661	Microglia	0.621	0.01
Ckb	0	0	2.15531	Microglia	0.924	0.578
Igf1	0	0	2.11469	Microglia	0.643	0.112
Rac2	0	0	2.07575	Microglia	0.561	0.011
Ccl6	0	0	2.07229	Microglia	0.271	0.004
Cxcl16	0	0	2.07037	Microglia	0.624	0.114
Dnase2	0	0	2.02825	Microglia	0.651	0.149
Cybb	0	0	2.02151	Microglia	0.486	0.007
LOC100911825	0	0	2.01409	Microglia	0.53	0.011
Cd14	0	0	2.00137	Microglia	0.455	0.034
Lcp1	0	0	1.95678	Microglia	0.543	0.01
Cndp2	0	0	1.95303	Microglia	0.636	0.191
Tnfaip8l2	0	0	1.94643	Microglia	0.53	0.008
RT1-CE10	0	0	1.93364	Microglia	0.768	0.341
Psap	0	0	1.89243	Microglia	0.948	0.772
Mrc1	0	0	1.88754	Microglia	0.411	0.004
Cfd	0	0	1.84334	Microglia	0.391	0.01
Dpp7	0	0	1.82692	Microglia	0.782	0.429
Spi1	0	0	1.82176	Microglia	0.51	0.006
Pycard	0	0	1.80483	Microglia	0.562	0.127
Lst1	0	0	1.80053	Microglia	0.43	0.005
Cd53	0	0	1.79397	Microglia	0.507	0.006
Fcrl2	0	0	1.756	Microglia	0.377	0.003
C3	0	0	1.72106	Microglia	0.359	0.011
Mafb	0	0	1.7083	Microglia	0.453	0.018
Ly86	0	0	1.70215	Microglia	0.455	0.007
Fermt3	0	0	1.7009	Microglia	0.481	0.007
Cotl1	0	0	1.68267	Microglia	0.708	0.326
Fyb1	0	0	1.67174	Microglia	0.45	0.008
Cd37	0	0	1.66853	Microglia	0.456	0.006
Pou2f2	0	0	1.64856	Microglia	0.437	0.005
Plek	0	0	1.64456	Microglia	0.417	0.007
Cyba	0	0	1.6415	Microglia	0.958	0.827
Ptpn6	0	0	1.63653	Microglia	0.455	0.01
Ftl1	0	0	1.63383	Microglia	0.996	0.968
Blnk	0	0	1.63313	Microglia	0.455	0.011
Ucp2	0	0	1.62973	Microglia	0.735	0.388
Bin2	0	0	1.6269	Microglia	0.456	0.008
Bcl2a1	0	0	1.6164	Microglia	0.382	0.006
Hexb	0	0	1.59284	Microglia	0.547	0.152
Cd302	0	0	1.58411	Microglia	0.583	0.174
Fth1	0	0	1.58365	Microglia	1	0.998
Csf2ra	0	0	1.5645	Microglia	0.473	0.083
Ptprc	0	0	1.56192	Microglia	0.431	0.005
Ltc4s	0	0	1.55787	Microglia	0.352	0.005
Sirpa	0	0	1.52406	Microglia	0.505	0.097
Nckap1l	0	0	1.50767	Microglia	0.434	0.006
Hcls1	0	0	1.50683	Microglia	0.393	0.007
P2ry6	0	0	1.50275	Microglia	0.42	0.018
Epsti1	0	0	1.49788	Microglia	0.41	0.006
Arl11	0	0	1.49101	Microglia	0.396	0.006
Clec7a	0	0	1.4837	Microglia	0.312	0.005
Ninj1	0	0	1.4628	Microglia	0.783	0.562
Alox5ap	0	0	1.45911	Microglia	0.39	0.008
Cstb	0	0	1.45176	Microglia	0.907	0.799
Cfp	0	0	1.44627	Microglia	0.337	0.012
Ifngr1	0	0	1.44544	Microglia	0.573	0.245
Glul	0	0	1.40995	Microglia	0.62	0.274
Apbb1ip	0	0	1.40445	Microglia	0.412	0.033
Hpgds	0	0	1.37923	Microglia	0.324	0.004
Gna15	0	0	1.373	Microglia	0.368	0.005
Gmpr	0	0	1.37177	Microglia	0.405	0.041
Limd2	0	0	1.37063	Microglia	0.626	0.316
Sdf2l1	0	0	1.37062	Microglia	0.586	0.286
Clec4a1	0	0	1.3693	Microglia	0.348	0.003
Itm2b	0	0	1.35952	Microglia	0.921	0.823
LOC100360087	0	0	1.35825	Microglia	0.818	0.623
Apobec1	0	0	1.35082	Microglia	0.319	0.004
Ccnd1	0	0	1.34324	Microglia	0.551	0.24
Dock8	0	0	1.34239	Microglia	0.367	0.014
Ncf1	0	0	1.34233	Microglia	0.349	0.006
Pld3	0	0	1.33899	Microglia	0.519	0.302
Gpr84	0	0	1.33045	Microglia	0.331	0.004
Fcgr1a	0	0	1.32943	Microglia	0.343	0.004
Tlr2	0	0	1.32888	Microglia	0.34	0.007
Lgals3	0	0	1.32756	Microglia	0.712	0.544
Lyn	0	0	1.32694	Microglia	0.388	0.035
Ctsa	0	0	1.32085	Microglia	0.819	0.654
Unc93b1	0	0	1.31545	Microglia	0.379	0.061
Irf8	0	0	1.29978	Microglia	0.354	0.006
Ch25h	0	0	1.27896	Microglia	0.255	0.008
Ctsh	0	0	1.27516	Microglia	0.83	0.602
RT1-A2	0	0	1.27282	Microglia	0.479	0.179
Hck	0	0	1.2639	Microglia	0.312	0.005
Clec2l	0	0	1.25568	Microglia	0.338	0.006
Ier3	0	0	1.24332	Microglia	0.827	0.69
Cmtm7	0	0	1.23886	Microglia	0.707	0.462
Lcp2	0	0	1.23786	Microglia	0.348	0.005
Rgs1	0	0	1.23404	Microglia	0.301	0.004
Hcst	0	0	1.22417	Microglia	0.353	0.004
Hmox1	0	0	1.22132	Microglia	0.547	0.269
Tmsb4x	0	0	1.22122	Microglia	1	0.999
Ywhah	0	0	1.21943	Microglia	0.707	0.552
Atox1	0	0	1.21435	Microglia	0.87	0.78
Tkt	0	0	1.2114	Microglia	0.765	0.585
Il18	0	0	1.19952	Microglia	0.337	0.01
Adam15	0	0	1.19596	Microglia	0.416	0.139
Skap2	0	0	1.19151	Microglia	0.389	0.106
Atp1b1	0	0	1.18163	Microglia	0.471	0.258
Hk2	0	0	1.1709	Microglia	0.485	0.191
Tgfbr1	0	0	1.17007	Microglia	0.358	0.116
Tmem37	0	0	1.14767	Microglia	0.382	0.081
Fam49b	0	0	1.14611	Microglia	0.485	0.224
Dab2	0	0	1.14466	Microglia	0.397	0.178
Ap2s1	0	0	1.14282	Microglia	0.772	0.647
Tpp1	0	0	1.13692	Microglia	0.529	0.321
Sgk1	0	0	1.11272	Microglia	0.312	0.042
C5ar1	0	0	1.10114	Microglia	0.251	0.003
Myo1f	0	0	1.10042	Microglia	0.315	0.015
Smpdl3a	0	0	1.09745	Microglia	0.328	0.143
Gns.1	0	0	1.0974	Microglia	0.485	0.253
Cd83	0	0	1.09616	Microglia	0.276	0.007
Was	0	0	1.08828	Microglia	0.271	0.006
Fcgr2b	0	0	1.08656	Microglia	0.281	0.004
Sh3bgrl3	0	0	1.08256	Microglia	0.873	0.77
Inpp5d	0	0	1.07843	Microglia	0.293	0.004
Fuca1	0	0	1.07568	Microglia	0.731	0.567
Erp29	0	0	1.07557	Microglia	0.788	0.666
Nlrp3	0	0	1.06858	Microglia	0.285	0.014
Clta	0	0	1.06288	Microglia	0.936	0.873
Gatm	0	0	1.05444	Microglia	0.321	0.03
Abhd12	0	0	1.04923	Microglia	0.497	0.265
Lpcat2	0	0	1.04546	Microglia	0.338	0.076
Lmo2	0	0	1.04215	Microglia	0.296	0.011
Rhog	0	0	1.03486	Microglia	0.472	0.259
Gng2	0	0	1.03309	Microglia	0.347	0.085
Rgs2	0	0	1.02913	Microglia	0.256	0.023
Tgfb1	0	0	1.02397	Microglia	0.573	0.361
Smap2	0	0	1.02191	Microglia	0.452	0.237
Pla2g4a	0	0	1.02191	Microglia	0.355	0.102
Snx20	0	0	1.0195	Microglia	0.265	0.009
Arpc4	0	0	1.01894	Microglia	0.765	0.637
Ccl2	0	0	1.01347	Microglia	0.307	0.124
Iah1	0	0	1.00291	Microglia	0.551	0.355
Sod2	1.3167e-263	2.1802e-259	1.12196	Microglia	0.598	0.505
Serpine2	0	0	4.79457	OEC	0.997	0.348
Igfbp5	0	0	4.41971	OEC	0.948	0.136
S100b	0	0	3.99827	OEC	0.917	0.061
Fbln2	0	0	3.54452	OEC	0.809	0.058
Crlf1	0	0	3.34736	OEC	0.93	0.143
Sfrp1	0	0	2.93367	OEC	0.946	0.328
Calcb	0	0	2.93145	OEC	0.499	0.039
Csrp2	0	0	2.93128	OEC	0.919	0.381
Il33	0	0	2.83844	OEC	0.739	0.081
Nes	0	0	2.79044	OEC	0.887	0.236
Col12a1	0	0	2.74856	OEC	0.95	0.378
Fxyd1	0	0	2.73059	OEC	0.828	0.155
Cmtm5	0	0	2.72909	OEC	0.851	0.037
Col11a1	0	0	2.6267	OEC	0.802	0.338
AABR07014424.1	0	0	2.57633	OEC	0.667	0.029
S100a4	0	0	2.53933	OEC	0.897	0.474
Dbi	0	0	2.50561	OEC	0.988	0.805
Postn	0	0	2.41005	OEC	0.573	0.174
Cnp	0	0	2.36292	OEC	0.852	0.192
Rassf4	0	0	2.30147	OEC	0.79	0.11
Tnc	0	0	2.295	OEC	0.925	0.326
Plat	0	0	2.2828	OEC	0.859	0.208
Mpz	0	0	2.25546	OEC	0.471	0.025
Cox5b	0	0	2.22054	OEC	0.974	0.867
Plp1	0	0	2.21143	OEC	0.695	0.032
Cd9	0	0	2.19973	OEC	0.614	0.075
Nefm	0	0	2.19702	OEC	0.442	0.024
Ngfr	0	0	2.146	OEC	0.63	0.024
Scrn1	0	0	2.14405	OEC	0.848	0.249
Actr1b	0	0	2.05339	OEC	0.781	0.201
Vim	0	0	2.03483	OEC	1	0.973
Uchl1	0	0	2.00995	OEC	0.754	0.149
Apod	0	0	2.00827	OEC	0.623	0.055
Gpc1	0	0	2.00163	OEC	0.684	0.112
Pmp22	0	0	1.98745	OEC	0.774	0.498
Fam19a5	0	0	1.9712	OEC	0.72	0.051
Plk2	0	0	1.90818	OEC	0.734	0.16
Pcsk1	0	0	1.90658	OEC	0.349	0.013
Vcan	0	0	1.86901	OEC	0.681	0.217
Ndrg2	0	0	1.85231	OEC	0.655	0.111
Gal	0	0	1.80119	OEC	0.271	0.014
Gas7	0	0	1.79009	OEC	0.563	0.028
Chl1	0	0	1.76639	OEC	0.548	0.017
Gask1b	0	0	1.76147	OEC	0.859	0.491
S100a10	0	0	1.75021	OEC	0.985	0.781
Arsi	0	0	1.74987	OEC	0.48	0.028
Sod3	0	0	1.74693	OEC	0.85	0.513
Limch1	0	0	1.74541	OEC	0.608	0.021
Cdh2	0	0	1.73311	OEC	0.684	0.111
Igfbp3	0	0	1.72971	OEC	0.305	0.061
Sapcd1	0	0	1.72418	OEC	0.735	0.187
Slitrk6	0	0	1.71364	OEC	0.588	0.021
Sox10	0	0	1.69997	OEC	0.628	0.023
Pdlim4	0	0	1.65697	OEC	0.781	0.339
Fabp7	0	0	1.65243	OEC	0.53	0.019
Nell1	0	0	1.64682	OEC	0.572	0.023
Marcksl1	0	0	1.64379	OEC	0.882	0.505
Cadm4	0	0	1.64025	OEC	0.64	0.108
Pcdh20	0	0	1.62324	OEC	0.547	0.035
Ttyh1	0	0	1.60243	OEC	0.52	0.018
Tspan7	0	0	1.58554	OEC	0.63	0.101
Lmo4	0	0	1.5842	OEC	0.785	0.394
Cntf	0	0	1.56351	OEC	0.537	0.034
Calca	0	0	1.56117	OEC	0.319	0.015
Cdh19	0	0	1.55529	OEC	0.541	0.018
Col5a2	0	0	1.542	OEC	0.893	0.49
Gldn	0	0	1.52695	OEC	0.263	0.017
Egfl8	0	0	1.52375	OEC	0.397	0.022
LOC108348172.1	0	0	1.51407	OEC	0.553	0.09
Ncam1	0	0	1.51273	OEC	0.596	0.135
Gamt	0	0	1.49351	OEC	0.649	0.176
Sorcs2	0	0	1.49212	OEC	0.539	0.018
Pmepa1	0	0	1.49075	OEC	0.929	0.761
Npdc1	0	0	1.48646	OEC	0.687	0.261
Marcks	0	0	1.44671	OEC	0.939	0.789
Ddah2	0	0	1.43394	OEC	0.73	0.34
Btg1	0	0	1.42804	OEC	0.719	0.348
Btc	0	0	1.41992	OEC	0.43	0.019
Pcbp4	0	0	1.41905	OEC	0.698	0.223
Reln	0	0	1.41825	OEC	0.476	0.012
Arpc1a	0	0	1.41617	OEC	0.811	0.581
Col20a1	0	0	1.40704	OEC	0.437	0.016
Insc	0	0	1.40682	OEC	0.523	0.019
Sdc3	0	0	1.39872	OEC	0.536	0.125
Dst	0	0	1.39804	OEC	0.919	0.647
LOC108348064	0	0	1.39138	OEC	0.715	0.505
Cd44	0	0	1.38535	OEC	0.639	0.183
Gpx3	0	0	1.34318	OEC	0.457	0.052
Gpm6b	0	0	1.33919	OEC	0.501	0.037
Il11	0	0	1.33398	OEC	0.291	0.028
Slc22a17	0	0	1.33235	OEC	0.549	0.104
Acan	0	0	1.3187	OEC	0.27	0.009
Myl12b	0	0	1.31239	OEC	0.903	0.648
Cadm1	0	0	1.30747	OEC	0.48	0.04
Secisbp2l	0	0	1.30592	OEC	0.675	0.269
Ucn2	0	0	1.30564	OEC	0.291	0.01
Prnp	0	0	1.298	OEC	0.865	0.571
Add3	0	0	1.29593	OEC	0.575	0.133
Plpp1	0	0	1.29385	OEC	0.569	0.163
Gadd45a	0	0	1.29032	OEC	0.537	0.237
Dclk1	0	0	1.28475	OEC	0.852	0.516
Ugdh	0	0	1.28307	OEC	0.728	0.323
Bpgm	0	0	1.27902	OEC	0.61	0.176
Ctnnd1	0	0	1.27358	OEC	0.616	0.2
Tgfbi	0	0	1.26623	OEC	0.302	0.024
Scn7a	0	0	1.26046	OEC	0.321	0.009
Taldo1	0	0	1.25356	OEC	0.86	0.613
Runx1	0	0	1.24867	OEC	0.557	0.146
Atf3	0	0	1.24809	OEC	0.495	0.17
Cd200	0	0	1.23954	OEC	0.683	0.354
Fermt2	0	0	1.23882	OEC	0.914	0.688
Serpine1	0	0	1.23694	OEC	0.739	0.456
Tuba1a	0	0	1.23525	OEC	0.976	0.869
Rgcc	0	0	1.22995	OEC	0.638	0.246
Tnfrsf19	0	0	1.21393	OEC	0.412	0.038
Agrn	0	0	1.21265	OEC	0.529	0.107
Lgi4	0	0	1.21167	OEC	0.412	0.017
Inhba	0	0	1.20934	OEC	0.44	0.127
Atrn	0	0	1.20839	OEC	0.568	0.157
Fads1	0	0	1.2071	OEC	0.505	0.072
Erbb3	0	0	1.2061	OEC	0.441	0.02
Ivns1abp	0	0	1.20417	OEC	0.552	0.149
Tnfrsf12a	0	0	1.1987	OEC	0.704	0.357
Cryab	0	0	1.19788	OEC	0.658	0.509
Crip1	0	0	1.19768	OEC	0.358	0.109
Fstl3	0	0	1.191	OEC	0.503	0.148
Dbndd2	0	0	1.18521	OEC	0.71	0.41
Mpp6	0	0	1.18509	OEC	0.574	0.208
Itprid2	0	0	1.18303	OEC	0.58	0.191
Nqo1	0	0	1.18094	OEC	0.413	0.176
Ctnnbip1	0	0	1.17869	OEC	0.639	0.316
Metrn	0	0	1.15887	OEC	0.441	0.042
Sema4c	0	0	1.15757	OEC	0.426	0.034
Zeb2	0	0	1.1524	OEC	0.627	0.225
Slc44a1	0	0	1.15156	OEC	0.565	0.185
Afap1l2	0	0	1.1477	OEC	0.572	0.179
Hmgn3	0	0	1.14466	OEC	0.618	0.301
Nudt4	0	0	1.14229	OEC	0.813	0.593
Adgrg1	0	0	1.13818	OEC	0.457	0.038
Map1a	0	0	1.11571	OEC	0.674	0.36
Akap13	0	0	1.11548	OEC	0.631	0.253
Ptn	0	0	1.10897	OEC	0.394	0.105
Ldha	0	0	1.10642	OEC	0.954	0.877
Efr3a	0	0	1.10046	OEC	0.651	0.34
Mid1ip1	0	0	1.09999	OEC	0.559	0.231
Nus1	0	0	1.09639	OEC	0.619	0.299
Ccser2	0	0	1.09265	OEC	0.562	0.216
Chrdl2	0	0	1.0898	OEC	0.32	0.01
Col9a2	0	0	1.08961	OEC	0.315	0.11
Asap2	0	0	1.08913	OEC	0.403	0.066
LOC108348175	0	0	1.08163	OEC	0.58	0.209
Itgb8	0	0	1.07305	OEC	0.352	0.016
Lpar1	0	0	1.06924	OEC	0.392	0.025
Heyl	0	0	1.06675	OEC	0.438	0.058
Pacsin2	0	0	1.06461	OEC	0.538	0.183
Chmp4c	0	0	1.06386	OEC	0.53	0.197
Sspn	0	0	1.05725	OEC	0.464	0.096
Abcb4	0	0	1.05325	OEC	0.513	0.095
Rabep1	0	0	1.04804	OEC	0.59	0.248
Tpst2	0	0	1.04192	OEC	0.461	0.145
Plekhb1	0	0	1.03997	OEC	0.38	0.014
Mcam	0	0	1.03882	OEC	0.582	0.204
Cox6b2	0	0	1.03579	OEC	0.286	0.074
Serpinb6a	0	0	1.03009	OEC	0.671	0.486
Sash1	0	0	1.02267	OEC	0.536	0.215
Qprt	0	0	1.01289	OEC	0.396	0.032
Sptbn1	0	0	1.00689	OEC	0.83	0.555
