# Supplementary material for: Olfactory ensheathing cells from adult female rats are hybrid glia that promote neural repair
Source: eLife. 2025 Apr 29;13:RP95629. doi: 10.7554/eLife.95629 (PMC12040321; doi:10.7554/eLife.95629)
Supplement: Supplementary file 2. — The list of genes that are significantly enriched in each of the five OEC subclusters identified by single-cell RNA-sequencing. The columns show the nominal p-value, the multiple-testing-adjusted P value, the log2 fold change (relative to all other OEC subclusters), and the OEC subcluster (0–4) in which each gene was most strongly enriched. Genes are grouped based on the subcluster where their expression is highly specific, providing a unique transcriptional signature for each OEC subtype. [file elife-95629-supp2.xlsx]

## Sheet: Sheet1
Gene	P_value	Adjusted_P_value	Log2 fold change	OEC subtype	Percentage of cells expressing the gene in the subtype	Percentage of cells expressing the gene in all the other subtypes
Pmp22	0	0	1.42693	0	0.997	0.91
Ccdc80	0	0	1.16602	0	0.876	0.698
Gldn	0	0	1.13044	0	0.853	0.685
Ccn3	0	0	1.06461	0	0.853	0.668
Col11a1	0	0	1.04944	0	0.993	0.944
Serpinf1	0	0	1.03498	0	0.958	0.856
Fbln2	0	0	1.02616	0	0.993	0.947
Nefm	0	0	0.976078	0	0.748	0.524
Ccn2	0	0	0.909902	0	0.91	0.75
RGD1305645	0	0	0.869798	0	0.85	0.721
Nqo1	0	0	0.849003	0	0.929	0.832
Marcks	0	0	0.839451	0	0.999	0.99
Prss23	0	0	0.813796	0	0.975	0.877
Rarres2	0	0	0.790846	0	0.877	0.755
Cck	0	0	0.774906	0	0.81	0.68
Fst	0	0	0.767211	0	0.819	0.651
Tagln	0	0	0.767147	0	0.989	0.958
Fn1	0	0	0.727893	0	0.969	0.861
Cd200	0	0	0.727542	0	0.923	0.749
Dpysl3	0	0	0.69111	0	0.912	0.746
Tgfbi	0	0	0.688635	0	0.919	0.786
Sfrp1	0	0	0.686843	0	0.991	0.933
Timp3	0	0	0.684003	0	0.846	0.639
Serpine2	0	0	0.653705	0	1	0.999
Pmepa1	0	0	0.648985	0	0.999	0.988
C1qtnf12	0	0	0.648055	0	0.83	0.642
Ddah1	0	0	0.631428	0	0.974	0.885
Tnfrsf19	0	0	0.619313	0	0.875	0.738
Nid1	0	0	0.612179	0	0.948	0.781
Cald1	0	0	0.611981	0	0.998	0.974
Tpm1	0	0	0.597477	0	0.995	0.968
Mmp2	0	0	0.563227	0	0.878	0.754
Col1a1	0	0	0.55542	0	0.998	0.982
Hmgn3	0	0	0.552195	0	0.959	0.87
Tsc22d1	0	0	0.540215	0	0.929	0.811
Ccnd1	0	0	0.509315	0	0.87	0.701
Rai14	0	0	0.499647	0	0.948	0.864
Selenom	0	0	0.494251	0	0.989	0.932
Csrp2	0	0	0.490594	0	0.998	0.981
Chmp4c	0	0	0.489196	0	0.918	0.789
Slc7a11	0	0	0.478046	0	0.731	0.521
Fstl1	0	0	0.474778	0	0.985	0.923
Lmo4	0	0	0.462119	0	0.986	0.94
Ddit4l2	0	0	0.454938	0	0.706	0.586
P3h4	0	0	0.453001	0	0.934	0.8
Nrn1	0	0	0.44623	0	0.79	0.627
Vdr	0	0	0.44051	0	0.847	0.723
Sipa1l1	0	0	0.405219	0	0.901	0.773
Rab38	0	0	0.392365	0	0.723	0.546
Gpc4	0	0	0.386062	0	0.858	0.703
Nrg1	0	0	0.384527	0	0.806	0.655
Scrg1	0	0	0.378599	0	0.853	0.671
Amacr	0	0	0.365695	0	0.786	0.616
Olfm2	0	0	0.364117	0	0.825	0.7
Epas1	0	0	0.356706	0	0.831	0.7
Pid1	0	0	0.352727	0	0.831	0.616
LOC103693210	0	0	0.345237	0	0.809	0.62
Pam	0	0	0.344796	0	0.882	0.759
Moxd1	0	0	0.344543	0	0.727	0.596
C1qtnf5	0	0	0.340112	0	0.824	0.665
Actn1	0	0	0.336261	0	0.881	0.757
Ltbp1	0	0	0.331913	0	0.787	0.652
Nbas	0	0	0.331236	0	0.743	0.572
Spata13	0	0	0.327391	0	0.754	0.549
Flrt3	0	0	0.326864	0	0.761	0.563
Alcam	0	0	0.32542	0	0.746	0.539
Fth1	0	0	0.323917	0	1	1
Avpr1a	0	0	0.296815	0	0.792	0.677
Robo2	0	0	0.293668	0	0.719	0.57
Smad7	0	0	0.2832	0	0.812	0.682
Adgrl2	0	0	0.274543	0	0.84	0.701
Slc6a6	0	0	0.260376	0	0.78	0.653
Lpcat2	0	0	0.258895	0	0.701	0.5
Dlc1	0	0	0.250658	0	0.774	0.649
Col14a1	8.89289e-308	1.77858e-304	0.341216	0	0.749	0.632
Egflam	3.19986e-301	6.39972e-298	0.390615	0	0.739	0.59
Mpz	5.96946e-296	1.19389e-292	0.678323	0	0.784	0.622
Aebp1	3.26067e-289	6.52134e-286	0.483202	0	0.997	0.975
Ncam1	2.20951e-286	4.41901e-283	0.466492	0	0.845	0.672
Col4a1	1.47112e-285	2.94224e-282	0.338834	0	0.998	0.986
Tmed3	3.6485e-278	7.29699e-275	0.354657	0	0.898	0.76
Usp53	2.12785e-276	4.25571e-273	0.414253	0	0.755	0.61
Bgn	2.36368e-271	4.72736e-268	0.439925	0	0.923	0.842
Cpne8	6.39499e-271	1.279e-267	0.409556	0	0.845	0.734
Col16a1	5.06717e-267	1.01343e-263	0.36417	0	0.802	0.645
Zfp36l2	2.0652e-266	4.13041e-263	0.362904	0	0.852	0.734
Ctsh	1.07931e-262	2.15862e-259	0.447313	0	0.97	0.884
Cpm	5.76852e-262	1.1537e-258	0.323803	0	0.678	0.562
Fstl3	1.10761e-260	2.21522e-257	0.357851	0	0.878	0.697
Hmgcs1	2.23196e-256	4.46393e-253	0.437406	0	0.809	0.645
Cavin3	1.68548e-255	3.37097e-252	0.401473	0	0.849	0.686
Ajap1	2.2721e-249	4.54421e-246	0.268566	0	0.665	0.51
Arhgap5	6.87101e-249	1.3742e-245	0.378616	0	0.834	0.684
S1pr3	9.58147e-246	1.91629e-242	0.365644	0	0.878	0.768
Fdps	5.8761e-243	1.17522e-239	0.481665	0	0.916	0.783
Gpx3	6.63444e-243	1.32689e-239	0.431788	0	0.898	0.767
Nkain4	1.99579e-236	3.99158e-233	0.367189	0	0.691	0.541
Ndrg2	1.62935e-231	3.25869e-228	0.484802	0	0.94	0.843
Actg1	2.14547e-230	4.29094e-227	0.322549	0	0.997	0.991
Emilin1	3.89381e-230	7.78762e-227	0.377265	0	0.943	0.866
Ebpl	7.46594e-227	1.49319e-223	0.276689	0	0.891	0.761
Col9a2	4.03435e-225	8.0687e-222	0.547205	0	0.884	0.801
Eva1b	4.43522e-224	8.87043e-221	0.420993	0	0.824	0.684
Nefl	4.59649e-215	9.19298e-212	0.626173	0	0.606	0.455
Sod3	4.74558e-215	9.49117e-212	0.419268	0	0.998	0.98
Hspa5	6.61559e-215	1.32312e-211	0.36775	0	0.968	0.905
Col12a1	9.78156e-211	1.95631e-207	0.333004	0	0.99	0.965
Ckap4	1.01996e-208	2.03992e-205	0.347396	0	0.93	0.823
LOC102549542	2.10583e-207	4.21166e-204	0.361901	0	0.648	0.529
Ifitm2	9.14169e-205	1.82834e-201	0.349492	0	0.943	0.839
Cuedc2	9.44904e-205	1.88981e-201	0.377889	0	0.769	0.641
Nedd9	3.26474e-204	6.52949e-201	0.283436	0	0.714	0.61
Egfl8	8.83444e-203	1.76689e-199	0.481368	0	0.685	0.52
Rflnb	4.91143e-202	9.82286e-199	0.294032	0	0.848	0.702
Penk	6.05879e-201	1.21176e-197	0.446625	0	0.722	0.6
Metrn	1.35559e-199	2.71118e-196	0.334321	0	0.828	0.678
Tpst2	2.06443e-199	4.12886e-196	0.407761	0	0.856	0.735
App	8.27503e-197	1.65501e-193	0.318142	0	0.985	0.954
Msmo1	7.68932e-194	1.53786e-190	0.333505	0	0.866	0.713
Pea15	4.13641e-192	8.27283e-189	0.335516	0	0.973	0.901
Lhfpl6	4.35448e-192	8.70895e-189	0.262299	0	0.866	0.739
Maged1	3.49489e-190	6.98978e-187	0.313238	0	0.933	0.843
Sema6d	8.1616e-190	1.63232e-186	0.256567	0	0.719	0.585
Olfml2a	4.7348e-180	9.46959e-177	0.253097	0	0.792	0.666
Inhba	5.84566e-180	1.16913e-176	0.312702	0	0.86	0.737
Nell1	1.90225e-174	3.80451e-171	0.294698	0	0.945	0.846
Ostc	5.29903e-174	1.05981e-170	0.323765	0	0.961	0.886
Ctsl	2.44955e-173	4.8991e-170	0.347133	0	0.989	0.951
Gask1b	7.72208e-173	1.54442e-169	0.290465	0	0.997	0.988
Car3	1.51616e-171	3.03233e-168	0.330702	0	0.766	0.681
Ccn1	3.13331e-171	6.26662e-168	0.294109	0	0.838	0.702
Calr	3.31542e-170	6.63085e-167	0.261966	0	0.997	0.989
Gstp1	8.82477e-167	1.76495e-163	0.419701	0	0.984	0.939
Rcn3	1.19415e-166	2.38831e-163	0.296213	0	0.929	0.821
Utrn	2.72272e-165	5.44543e-162	0.258336	0	0.799	0.663
AABR07014424.1	1.37345e-164	2.74691e-161	0.378876	0	0.906	0.804
S100a11	9.41357e-156	1.88271e-152	0.255017	0	0.998	0.991
Ddx1	7.60489e-155	1.52098e-151	0.315731	0	0.83	0.708
Fads1	1.19238e-154	2.38475e-151	0.306821	0	0.888	0.789
Slc44a1	3.6623e-154	7.32459e-151	0.307307	0	0.952	0.862
Gas6	8.57065e-152	1.71413e-148	0.279034	0	0.83	0.718
Acly	8.55741e-150	1.71148e-146	0.265704	0	0.828	0.704
Scn7a	5.91164e-148	1.18233e-144	0.391935	0	0.621	0.491
Fxyd1	3.18884e-146	6.37769e-143	0.351767	0	0.993	0.965
Sdc3	1.19231e-144	2.38461e-141	0.26191	0	0.977	0.938
Cntf	3.28263e-142	6.56527e-139	0.317452	0	0.937	0.847
Cebpd	2.30706e-140	4.61411e-137	0.344721	0	0.632	0.495
Crip1	3.71387e-140	7.42774e-137	0.353567	0	0.777	0.654
Ttyh1	2.2765e-139	4.55301e-136	0.304525	0	0.832	0.701
Cd59	1.48328e-131	2.96656e-128	0.27367	0	0.658	0.521
Ivns1abp	2.22939e-129	4.45878e-126	0.26596	0	0.959	0.889
Mid1ip1	7.85562e-127	1.57112e-123	0.286898	0	0.789	0.649
Arsi	8.52458e-126	1.70492e-122	0.279723	0	0.694	0.546
Id3	3.08305e-124	6.16611e-121	0.345539	0	0.977	0.944
Atp1b3	2.34231e-114	4.68461e-111	0.306014	0	0.981	0.946
Ifi27	2.18078e-110	4.36156e-107	0.29286	0	0.638	0.476
Cyp51	2.73194e-106	5.46387e-103	0.2527	0	0.842	0.729
Cd9	2.15371e-101	4.30742e-98	0.293015	0	0.825	0.702
Ptn	4.8382e-95	9.67641e-92	0.2757	0	0.735	0.616
Pdpn	2.51571e-92	5.03141e-89	0.265261	0	0.573	0.441
Nrxn1	5.50636e-83	1.10127e-79	0.266272	0	0.536	0.453
Gfap	7.16926e-76	1.43385e-72	0.327227	0	0.597	0.51
Col8a1	5.71805e-47	1.14361e-43	0.30636	0	0.513	0.441
Slc1a3	2.23281e-44	4.46563e-41	0.250519	0	0.535	0.466
Igfbp3	2.86028e-42	5.72056e-39	0.577576	0	0.822	0.757
Entpd2	1.95077e-23	3.90154e-20	0.286462	0	0.589	0.541
Calca	6.00289e-13	1.20058e-09	0.254294	0	0.508	0.458
Pcsk1	0	0	1.61646	1	0.84	0.754
Gal	0	0	1.60815	1	0.767	0.647
Atf3	0	0	1.23409	1	0.852	0.742
Ucn2	0	0	1.22251	1	0.705	0.526
Crabp2	0	0	1.1415	1	0.82	0.715
Btc	0	0	1.07855	1	0.877	0.758
LOC108348064	0	0	1.07843	1	0.966	0.954
Chrdl2	0	0	1.06588	1	0.836	0.743
Cast	0	0	1.03775	1	0.937	0.918
Il11	0	0	0.961034	1	0.803	0.685
Ngfr	0	0	0.960254	1	0.969	0.92
Nes	0	0	0.952867	1	0.954	0.924
S100b	0	0	0.918123	1	0.999	0.994
Vcan	0	0	0.903495	1	0.93	0.898
Bdnf	0	0	0.900581	1	0.827	0.781
Stim1	0	0	0.884082	1	0.899	0.861
LOC102549726	0	0	0.810796	1	0.952	0.928
Acan	0	0	0.800339	1	0.849	0.802
Col20a1	0	0	0.779427	1	0.861	0.817
Cnp	0	0	0.778428	1	0.966	0.942
Crispld2	0	0	0.757124	1	0.775	0.763
Flnc	0	0	0.707994	1	0.864	0.808
Cox5b	0	0	0.643927	1	0.999	1
Runx2	0	0	0.546254	1	0.717	0.693
Atp2b4	1.12313e-305	2.24626e-302	0.749256	1	0.888	0.879
Col7a1	3.30372e-299	6.60745e-296	0.655282	1	0.745	0.62
Evi2a	3.17248e-291	6.34496e-288	0.730223	1	0.76	0.735
Tmem206	1.72545e-276	3.45091e-273	0.404115	1	0.636	0.511
Lims2	1.57482e-275	3.14964e-272	0.555246	1	0.77	0.734
Csrp3	6.07553e-267	1.21511e-263	0.50839	1	0.666	0.679
Arhgap11a	4.16295e-264	8.32589e-261	0.454765	1	0.64	0.601
Ndrg4	2.30929e-258	4.61858e-255	0.419378	1	0.787	0.772
Gpc1	7.03142e-255	1.40628e-251	0.572747	1	0.973	0.979
AABR07031756.1	7.34263e-255	1.46853e-251	0.571901	1	0.77	0.745
AABR07054614.1	1.37913e-247	2.75827e-244	0.317465	1	0.631	0.61
Nsg2	2.29649e-245	4.59298e-242	0.463236	1	0.719	0.704
Serpinb6a	4.02097e-242	8.04194e-239	0.873777	1	0.93	0.927
Sptbn1	1.95974e-238	3.91949e-235	0.521781	1	0.901	0.888
Slc18a2	6.73208e-232	1.34642e-228	0.630922	1	0.731	0.698
Gadd45a	7.04696e-231	1.40939e-227	0.72784	1	0.89	0.88
Lgals3	6.96043e-225	1.39209e-221	0.598101	1	0.935	0.935
Lgalsl	5.11758e-220	1.02352e-216	0.608686	1	0.785	0.755
Lonp2	5.83747e-219	1.16749e-215	0.669584	1	0.804	0.785
Star	9.94635e-210	1.98927e-206	0.255158	1	0.521	0.43
Gap43	3.24805e-206	6.49611e-203	1.1368	1	0.638	0.624
Cd109	6.25957e-205	1.25191e-201	0.512716	1	0.723	0.711
Map1a	6.24338e-202	1.24868e-198	0.560263	1	0.948	0.949
Btg1	8.43158e-179	1.68632e-175	0.546109	1	0.96	0.963
Ucp2	3.26631e-175	6.53261e-172	0.450485	1	0.856	0.867
Cadm1	7.11618e-163	1.42324e-159	0.53011	1	0.862	0.871
Sema4c	2.07361e-152	4.14723e-149	0.539025	1	0.844	0.825
Jun	1.98886e-151	3.97771e-148	0.545145	1	0.824	0.799
Dstn	5.13939e-151	1.02788e-147	0.375041	1	0.996	0.999
Id1	6.30187e-144	1.26037e-140	0.455311	1	0.852	0.873
Hspb1	2.24698e-141	4.49396e-138	0.858203	1	0.884	0.899
Cldn14	4.41912e-141	8.83824e-138	0.49442	1	0.726	0.712
Art3	7.38392e-141	1.47678e-137	0.423691	1	0.694	0.717
Aplp1	1.07677e-139	2.15353e-136	0.496554	1	0.809	0.797
Adamts4	1.42983e-129	2.85966e-126	0.512341	1	0.845	0.854
Plk2	5.80402e-129	1.1608e-125	0.500155	1	0.881	0.885
Adam19	1.12262e-128	2.24524e-125	0.728952	1	0.861	0.862
Scg5	7.99769e-127	1.59954e-123	0.481098	1	0.6	0.587
Csdc2	9.63889e-123	1.92778e-119	0.27415	1	0.647	0.66
Tmeff1	4.27042e-120	8.54083e-117	0.329112	1	0.743	0.77
Nudt4	1.03669e-119	2.07338e-116	0.413189	1	0.978	0.981
Lgals1	4.33199e-117	8.66399e-114	0.596077	1	0.917	0.927
Dnm3	3.44833e-112	6.89666e-109	0.486726	1	0.77	0.768
Clmn	1.45668e-109	2.91335e-106	0.339135	1	0.614	0.582
Htra3	4.31274e-109	8.62547e-106	0.364856	1	0.661	0.709
Parm1	6.26671e-109	1.25334e-105	0.377299	1	0.656	0.653
Cyb5a	1.14163e-105	2.28326e-102	0.400157	1	0.943	0.966
Mef2c	9.16339e-105	1.83268e-101	0.449277	1	0.891	0.904
Synm	6.58602e-104	1.3172e-100	0.387934	1	0.616	0.575
Lipa	1.37371e-97	2.74742e-94	0.40325	1	0.895	0.918
B3gnt2	5.39423e-90	1.07885e-86	0.428471	1	0.847	0.864
Phyhipl	6.04361e-90	1.20872e-86	0.250166	1	0.666	0.683
Jade1	9.35871e-90	1.87174e-86	0.41046	1	0.753	0.787
Emp1	5.11935e-87	1.02387e-83	0.42278	1	0.865	0.882
Hmcn1	9.30916e-87	1.86183e-83	0.454785	1	0.653	0.595
Pdlim4	2.31025e-84	4.6205e-81	0.367583	1	0.93	0.942
AC134224.3	2.46345e-84	4.9269e-81	0.405646	1	0.983	0.994
Gamt	3.51068e-80	7.02135e-77	0.425462	1	0.886	0.906
Hsd17b10	5.19094e-80	1.03819e-76	0.479512	1	0.785	0.787
Scn1b	1.40381e-75	2.80761e-72	0.372627	1	0.838	0.837
Tnc	1.16838e-69	2.33676e-66	0.257352	1	0.982	0.989
Serpine1	3.52307e-67	7.04615e-64	0.443387	1	0.921	0.933
Itga7	2.32121e-62	4.64242e-59	0.447248	1	0.664	0.691
Sox2	1.54519e-61	3.09037e-58	0.396407	1	0.618	0.679
Phtf2	3.07385e-61	6.1477e-58	0.288297	1	0.742	0.753
Col8a2	6.47287e-60	1.29457e-56	0.299854	1	0.733	0.777
Ctnnbip1	2.84689e-57	5.69377e-54	0.354376	1	0.905	0.917
Sox8	1.88887e-56	3.77775e-53	0.264362	1	0.674	0.741
Dap	6.06248e-55	1.2125e-51	0.395098	1	0.748	0.798
Afap1	3.85018e-52	7.70036e-49	0.412918	1	0.796	0.834
Pxylp1	3.87296e-52	7.74593e-49	0.274971	1	0.752	0.781
Arhgap24	6.607e-51	1.3214e-47	0.334732	1	0.738	0.781
Lpar1	1.19256e-49	2.38511e-46	0.338223	1	0.78	0.787
AABR07007068.1	1.61815e-48	3.23629e-45	0.341161	1	0.68	0.738
Map3k4	4.00083e-47	8.00166e-44	0.345433	1	0.747	0.735
Lpcat1	5.78737e-45	1.15747e-41	0.323854	1	0.801	0.827
Mdk	2.10086e-41	4.20172e-38	0.386246	1	0.758	0.772
Postn	3.24758e-41	6.49516e-38	0.615181	1	0.901	0.924
Zeb2	5.30763e-41	1.06153e-37	0.352497	1	0.827	0.837
Jag1	1.06717e-40	2.13434e-37	0.354362	1	0.884	0.913
Chsy1	4.3326e-39	8.6652e-36	0.266143	1	0.758	0.789
RGD1309104	2.52707e-37	5.05414e-34	0.286948	1	0.826	0.845
Pcdh20	2.69828e-32	5.39656e-29	0.318933	1	0.887	0.93
Igfbp5	8.81592e-32	1.76318e-28	0.808344	1	0.966	0.985
Plekho1	8.00499e-30	1.601e-26	0.281774	1	0.789	0.805
Sat1	1.77332e-28	3.54665e-25	0.390285	1	0.824	0.875
St3gal4	2.59794e-27	5.19588e-24	0.345873	1	0.696	0.712
Vegfa	6.05881e-24	1.21176e-20	0.258447	1	0.672	0.704
Myo10	3.75141e-22	7.50282e-19	0.282485	1	0.586	0.581
Qsox1	6.24821e-22	1.24964e-18	0.329486	1	0.787	0.841
Glrx	4.23121e-21	8.46241e-18	0.281337	1	0.697	0.718
Hsd11b2	6.10477e-17	1.22095e-13	0.613838	1	0.507	0.544
Dok5	9.09361e-14	1.81872e-10	0.267682	1	0.673	0.703
Prag1	1.0128e-12	2.0256e-09	0.274726	1	0.763	0.806
Itgb8	4.65517e-11	9.31034e-08	0.267371	1	0.514	0.525
Tppp3	1.10004e-10	2.20008e-07	0.53287	1	0.462	0.485
Sema3e	4.99407e-08	9.98814e-05	0.255088	1	0.588	0.648
Stmn1	0	0	2.5021	2	0.98	0.758
Prc1	0	0	2.11834	2	0.832	0.432
Pttg1	0	0	1.9709	2	0.934	0.591
Ube2c	0	0	1.96576	2	0.798	0.438
Cdk1	0	0	1.95144	2	0.856	0.484
Cenpw	0	0	1.89483	2	0.879	0.504
Cdkn3	0	0	1.87644	2	0.888	0.51
Cks2	0	0	1.82841	2	0.887	0.586
LOC100359539	0	0	1.80825	2	0.877	0.548
Spc24	0	0	1.70556	2	0.904	0.513
Dut	0	0	1.61393	2	0.957	0.722
LOC100360316	0	0	1.58535	2	0.941	0.726
Fam111a	0	0	1.51241	2	0.902	0.661
Cdca3	0	0	1.44268	2	0.787	0.372
Tuba1b	0	0	1.40585	2	1	0.94
Cks1b	0	0	1.21095	2	0.871	0.595
Ran	0	0	1.12452	2	0.989	0.927
Ranbp1	0	0	1.04251	2	0.979	0.857
Pclaf	0	0	0.833318	2	0.816	0.434
Tubb5	0	0	0.787126	2	0.998	0.987
Rps2	0	0	0.589779	2	1	0.999
Il1rl1	0	0	0.352727	2	0.835	0.608
Unc5b	0	0	0.277077	2	0.877	0.616
Tk1	1.38626e-305	2.77252e-302	0.830739	2	0.78	0.488
Cenpi	5.82977e-303	1.16595e-299	0.51636	2	0.774	0.48
Gldn	4.77471e-298	9.54943e-295	1.15016	2	0.965	0.752
Mki67	1.34816e-295	2.69633e-292	1.61335	2	0.768	0.343
Bard1	5.2765e-291	1.0553e-287	0.279873	2	0.781	0.435
Rpsa	1.79836e-289	3.59673e-286	0.568951	2	1	0.999
Pbk	3.6305e-289	7.261e-286	0.684474	2	0.732	0.254
Melk	3.5376e-287	7.07519e-284	0.404291	2	0.757	0.485
Tagln	1.9651e-285	3.9302e-282	1.25504	2	0.998	0.971
Cenph	1.33365e-281	2.6673e-278	0.810191	2	0.764	0.406
Rrm1	1.04075e-274	2.08149e-271	1.28332	2	0.836	0.532
Hnrnpa1	5.51515e-273	1.10303e-269	1.07409	2	0.959	0.847
Spc25	4.4424e-271	8.8848e-268	0.841033	2	0.772	0.469
Birc5	7.05363e-270	1.41073e-266	1.41167	2	0.768	0.442
Mcm4	2.06829e-269	4.13658e-266	0.756314	2	0.811	0.468
Actb	2.80169e-269	5.60338e-266	0.742229	2	0.998	0.99
Nucks1	8.1704e-259	1.63408e-255	1.05729	2	0.97	0.854
Ckap2	4.12735e-258	8.25471e-255	1.57298	2	0.759	0.441
Cenpm	1.11152e-255	2.22304e-252	0.578831	2	0.772	0.516
Tubb4b	4.73545e-253	9.4709e-250	1.20572	2	0.937	0.768
Cdca8	2.46524e-252	4.93049e-249	1.49277	2	0.768	0.426
Hmgb2	2.26915e-242	4.53831e-239	2.09878	2	0.897	0.711
Eef1b2	9.96037e-242	1.99207e-238	0.669621	2	0.992	0.963
Actg1	3.53164e-241	7.06329e-238	0.697491	2	0.999	0.994
Kif20a	1.4052e-239	2.81041e-236	1.11849	2	0.72	0.295
Depdc1	2.30673e-235	4.61345e-232	0.660739	2	0.702	0.237
Cpm	4.70869e-235	9.41739e-232	0.431753	2	0.871	0.601
Tuba1c	2.18668e-233	4.37336e-230	0.828263	2	0.82	0.565
Mis18a	2.63447e-233	5.26895e-230	0.533754	2	0.761	0.46
Pmf1	8.93884e-224	1.78777e-220	0.499285	2	0.774	0.518
Cenpa	2.18906e-223	4.37811e-220	0.823477	2	0.762	0.629
Kif23	3.06026e-215	6.12051e-212	1.11847	2	0.765	0.504
Ccna2	3.87761e-215	7.75522e-212	1.05452	2	0.737	0.535
Dctpp1	3.10115e-213	6.2023e-210	1.04102	2	0.781	0.473
Tpx2	2.91319e-212	5.82639e-209	1.85517	2	0.747	0.491
Cenpf	3.23114e-206	6.46227e-203	2.26493	2	0.731	0.424
Gmnn	1.07665e-202	2.15329e-199	1.15146	2	0.78	0.533
Asf1b	2.53639e-202	5.07277e-199	0.604314	2	0.705	0.388
Smc2	4.23271e-202	8.46543e-199	1.2826	2	0.793	0.587
Plk1	7.58045e-202	1.51609e-198	1.24806	2	0.733	0.474
Srsf2	2.85583e-201	5.71166e-198	0.873515	2	0.95	0.834
LOC100359583	4.04804e-197	8.09608e-194	0.572717	2	0.994	0.986
Rpa3	2.16457e-188	4.32913e-185	0.854562	2	0.968	0.816
Tmem97	5.92381e-188	1.18476e-184	0.728121	2	0.822	0.585
Npm1	1.41089e-185	2.82177e-182	0.543277	2	0.992	0.97
Ccdc80	5.56951e-185	1.1139e-181	0.965429	2	0.956	0.771
Ccne2	4.2812e-184	8.5624e-181	0.497595	2	0.756	0.541
Hist1h2bk	1.23511e-183	2.47021e-180	0.482136	2	0.72	0.58
Rps20	1.18317e-182	2.36635e-179	0.455854	2	0.999	0.997
Pdlim1	3.83763e-181	7.67525e-178	0.370446	2	0.88	0.673
AC108574.1	1.39873e-179	2.79745e-176	0.317512	2	0.875	0.611
Lig1	2.89878e-178	5.79756e-175	0.988052	2	0.777	0.526
Lox	5.27656e-177	1.05531e-173	0.260792	2	0.811	0.519
Rps5	6.45853e-177	1.29171e-173	0.440354	2	0.998	0.997
Rps18l1	1.23833e-176	2.47666e-173	0.387685	2	1	0.999
Mthfd2	1.26938e-174	2.53876e-171	0.517012	2	0.829	0.587
Myl9	5.21143e-173	1.04229e-169	0.64467	2	0.856	0.592
Nasp	3.34423e-172	6.68847e-169	0.925691	2	0.821	0.604
Pimreg	4.56624e-172	9.13248e-169	0.887704	2	0.651	0.141
Trim47	5.66092e-172	1.13218e-168	0.31447	2	0.767	0.54
Rpl14	2.68719e-171	5.37439e-168	0.406523	2	0.998	0.997
Rpl13	2.23757e-168	4.47514e-165	0.425844	2	0.999	0.997
Tubb6	7.82556e-168	1.56511e-164	0.871712	2	0.833	0.615
Smc4	1.9275e-167	3.85499e-164	1.06973	2	0.766	0.506
Cdc20	3.20117e-164	6.40234e-161	1.19413	2	0.697	0.434
Cenpe	3.56386e-164	7.12772e-161	1.42181	2	0.692	0.404
Psip1	8.69896e-164	1.73979e-160	0.906179	2	0.849	0.657
Calm1	1.2812e-158	2.5624e-155	0.719106	2	0.987	0.85
Cdca2	2.06778e-158	4.13557e-155	0.653154	2	0.642	0.238
Hspd1	5.3981e-157	1.07962e-153	0.639513	2	0.92	0.77
Fn1	1.66402e-155	3.32803e-152	0.779232	2	0.983	0.907
C1qtnf5	2.3726e-155	4.74519e-152	0.336738	2	0.932	0.728
Slc6a6	8.43788e-153	1.68758e-149	0.250908	2	0.885	0.702
Rplp0	1.9317e-149	3.8634e-146	0.316643	2	1	0.999
Kif2c	2.98e-149	5.96001e-146	0.527128	2	0.689	0.548
Troap	8.91023e-147	1.78205e-143	0.251236	2	0.68	0.41
Tacc3	1.68446e-145	3.36893e-142	0.917786	2	0.703	0.567
Cenpk	7.65113e-144	1.53023e-140	0.413882	2	0.709	0.485
Tcof1	1.24507e-143	2.49014e-140	0.649121	2	0.846	0.614
Reep4	1.62485e-142	3.2497e-139	0.510671	2	0.757	0.516
Cep55	3.72616e-142	7.45231e-139	0.76586	2	0.68	0.373
Fst	2.38757e-141	4.77515e-138	0.680259	2	0.896	0.72
Actn1	9.37883e-141	1.87577e-137	0.735551	2	0.951	0.807
Ccdc34	4.27121e-140	8.54241e-137	0.845243	2	0.85	0.652
Mastl	7.29317e-140	1.45863e-136	0.498374	2	0.641	0.259
Hsp90aa1	1.29746e-139	2.59491e-136	0.720793	2	0.995	0.948
Ube2s	1.88883e-138	3.77766e-135	0.888375	2	0.971	0.898
Nkain4	6.4539e-138	1.29078e-134	0.292371	2	0.883	0.594
Timp2	1.19516e-135	2.39033e-132	0.467866	2	0.956	0.771
Fbxo5	9.7844e-135	1.95688e-131	0.463052	2	0.695	0.524
Pcna	2.08804e-134	4.17607e-131	0.88494	2	0.853	0.681
LOC100911295	2.87774e-133	5.75548e-130	0.648717	2	0.923	0.806
Kif18b	1.65458e-131	3.30915e-128	0.541169	2	0.67	0.429
Rps12	6.2769e-131	1.25538e-127	0.428356	2	0.998	0.995
Eif5a	6.58497e-131	1.31699e-127	0.449947	2	0.98	0.934
Haus4	4.53429e-130	9.06858e-127	0.538766	2	0.662	0.392
Snrpa	2.39583e-128	4.79166e-125	0.650438	2	0.755	0.511
Ddah1	1.67846e-127	3.35692e-124	0.648188	2	0.995	0.923
Nt5dc2	2.48461e-127	4.96921e-124	0.538323	2	0.774	0.529
Ezh2	8.38556e-126	1.67711e-122	0.858331	2	0.815	0.651
Lsm2	1.07213e-125	2.14426e-122	0.812852	2	0.792	0.613
Rbm3	1.4122e-125	2.8244e-122	0.597832	2	0.965	0.889
Top2a	5.08037e-125	1.01607e-121	1.85537	2	0.659	0.379
Dlgap5	5.12685e-125	1.02537e-121	1.30105	2	0.692	0.507
Metrn	8.33962e-125	1.66792e-121	0.618195	2	0.947	0.736
Ndc80	6.86917e-123	1.37383e-119	0.894255	2	0.659	0.436
Txn1	4.92244e-122	9.84488e-119	0.518353	2	0.984	0.948
Bok	7.01094e-122	1.40219e-118	0.444036	2	0.664	0.451
Rplp1	1.34534e-121	2.69067e-118	0.299736	2	1	0.999
Rpl27a	2.22378e-121	4.44756e-118	0.318601	2	1	1
Igfbp3	4.97731e-119	9.95463e-116	0.687003	2	0.938	0.778
Fat1	2.99865e-116	5.99731e-113	0.396912	2	0.941	0.769
Kif20b	1.95408e-115	3.90816e-112	0.879019	2	0.662	0.415
Cdkn2c	3.06565e-115	6.13131e-112	0.423166	2	0.856	0.654
H2afx	2.06583e-114	4.13166e-111	1.02489	2	0.759	0.602
Incenp	8.57003e-114	1.71401e-110	0.572309	2	0.702	0.519
Aspm	7.04734e-113	1.40947e-109	0.820138	2	0.694	0.493
Rhob	1.27836e-112	2.55672e-109	0.57497	2	0.889	0.678
Actn4	4.23058e-111	8.46115e-108	0.565399	2	0.983	0.918
Nme2	1.60237e-110	3.20473e-107	0.324496	2	0.999	0.999
Ccn3	5.13844e-110	1.02769e-106	0.452866	2	0.915	0.745
Ska1	6.82264e-110	1.36453e-106	0.499752	2	0.63	0.375
Kpnb1	9.39832e-107	1.87966e-103	0.670096	2	0.886	0.813
Srsf3	1.38706e-105	2.77412e-102	0.586297	2	0.926	0.837
Eef1g	5.02831e-104	1.00566e-100	0.390045	2	0.986	0.968
Cald1	9.63909e-104	1.92782e-100	0.501815	2	1	0.984
Sfpq	3.94833e-103	7.89666e-100	0.658975	2	0.8	0.612
Reep5	1.01909e-102	2.03817e-99	0.535273	2	0.971	0.905
Ska2	1.27844e-102	2.55688e-99	0.458621	2	0.838	0.641
Dhfr	1.33059e-102	2.66117e-99	0.491541	2	0.682	0.527
Mybl2	5.05143e-102	1.01029e-98	0.321421	2	0.616	0.34
Stil	5.85575e-102	1.17115e-98	0.301975	2	0.662	0.538
LOC108351137	2.51454e-101	5.02908e-98	0.538963	2	0.935	0.82
Akap12	1.1951e-99	2.3902e-96	0.871596	2	0.841	0.669
Gja1	3.4904e-99	6.9808e-96	0.289006	2	0.812	0.587
Nuf2	5.80461e-99	1.16092e-95	1.05488	2	0.647	0.445
Rpl10a	2.92294e-98	5.84587e-95	0.331913	2	0.992	0.987
Cdkn2a	6.13406e-98	1.22681e-94	0.308764	2	0.879	0.681
Lmo4	6.24301e-98	1.2486e-94	0.557913	2	0.995	0.96
Esco2	6.8363e-98	1.36726e-94	0.624736	2	0.637	0.41
Jpt2	1.90969e-97	3.81938e-94	0.41055	2	0.782	0.621
Dek	4.44389e-97	8.88778e-94	0.846567	2	0.792	0.687
Uhrf1	1.84304e-95	3.68608e-92	0.656428	2	0.634	0.408
Rpl4	3.5234e-93	7.0468e-90	0.375125	2	0.971	0.949
Hmmr	5.8099e-93	1.16198e-89	1.04524	2	0.627	0.399
Sept8	8.18009e-93	1.63602e-89	0.33753	2	0.917	0.751
Mcm5	1.50527e-91	3.01054e-88	0.490824	2	0.65	0.548
Fabp5	2.27391e-91	4.54781e-88	0.559502	2	0.793	0.598
Rpa2	2.93645e-91	5.87289e-88	0.524032	2	0.665	0.445
Knstrn	2.95e-90	5.9e-87	1.07175	2	0.638	0.437
Mybl1	3.93826e-90	7.87652e-87	0.294821	2	0.658	0.516
Kif4a	3.21965e-89	6.43929e-86	0.762464	2	0.622	0.362
Hnrnpa2b1	6.5139e-89	1.30278e-85	0.445398	2	0.918	0.764
Tnfaip6	4.34657e-88	8.69315e-85	0.308214	2	0.804	0.611
Dnajc9	8.55326e-88	1.71065e-84	0.759121	2	0.744	0.61
Rbmx	9.64215e-88	1.92843e-84	0.415306	2	0.654	0.402
Ptn	8.20689e-87	1.64138e-83	0.477576	2	0.856	0.661
Sgo1	5.74718e-85	1.14944e-81	0.329659	2	0.595	0.377
Nop58	1.21294e-82	2.42587e-79	0.563597	2	0.764	0.621
Nusap1	3.40427e-79	6.80854e-76	1.13881	2	0.615	0.404
Usp1	3.71548e-79	7.43095e-76	0.731279	2	0.705	0.539
Ostc	7.39377e-79	1.47875e-75	0.421007	2	0.981	0.918
Snrpf	3.9397e-78	7.87939e-75	0.483428	2	0.929	0.871
LOC100363502	4.07573e-78	8.15147e-75	0.487517	2	0.972	0.894
Zdhhc2	5.68787e-78	1.13757e-74	0.4018	2	0.72	0.548
Plk4	5.70108e-78	1.14022e-74	0.531056	2	0.653	0.518
Rpl31	1.62326e-77	3.24652e-74	0.329542	2	0.983	0.973
Tmpo	3.59907e-77	7.19814e-74	0.694528	2	0.66	0.452
Ing2	9.81068e-76	1.96214e-72	0.30836	2	0.771	0.542
Ssx2ip	1.05697e-75	2.11393e-72	0.26326	2	0.734	0.576
Ect2	2.46769e-75	4.93538e-72	0.622056	2	0.597	0.361
Tuba1a	6.77582e-75	1.35516e-71	0.269469	2	0.997	0.996
Ttk	9.07414e-75	1.81483e-71	0.734037	2	0.633	0.518
Cavin3	1.37697e-72	2.75395e-69	0.4445	2	0.886	0.755
Myh10	5.97336e-72	1.19467e-68	0.572806	2	0.729	0.577
Pgam1	7.33884e-71	1.46777e-67	0.381891	2	0.926	0.823
Rad21	1.89854e-70	3.79708e-67	0.653985	2	0.88	0.761
Orc6	6.41908e-70	1.28382e-66	0.435945	2	0.691	0.48
Aurkb	8.35963e-70	1.67193e-66	0.432086	2	0.629	0.534
Cfap20	1.54393e-69	3.08787e-66	0.4008	2	0.909	0.744
Prim1	1.45235e-68	2.90469e-65	0.61612	2	0.668	0.494
Rps27l	5.25323e-68	1.05065e-64	0.288319	2	0.999	0.992
Ddx39a	1.13027e-67	2.26054e-64	0.468186	2	0.683	0.471
Oxct1	9.42187e-67	1.88437e-63	0.396241	2	0.754	0.592
Ncam1	1.84638e-66	3.69276e-63	0.433728	2	0.894	0.745
Dpysl3	3.84147e-65	7.68293e-62	0.443048	2	0.94	0.817
Smtn	2.60369e-64	5.20738e-61	0.278832	2	0.911	0.747
P3h4	1.96606e-63	3.93211e-60	0.383522	2	0.976	0.856
Mcm6	1.95233e-62	3.90465e-59	0.731229	2	0.656	0.492
Srsf7	3.43627e-62	6.87255e-59	0.50731	2	0.753	0.646
Timp3	1.59766e-61	3.19532e-58	0.316142	2	0.857	0.729
Tpm4	1.79128e-61	3.58256e-58	0.330954	2	0.897	0.704
Col18a1	1.03674e-60	2.07349e-57	0.335612	2	0.823	0.712
Zfp367	1.6959e-60	3.39179e-57	0.288801	2	0.671	0.55
Nde1	4.16913e-60	8.33826e-57	0.303591	2	0.692	0.541
Cotl1	1.2439e-59	2.4878e-56	0.431007	2	0.895	0.784
Siva1	1.27635e-59	2.55271e-56	0.636548	2	0.733	0.602
Cavin1	1.77947e-58	3.55895e-55	0.276353	2	0.929	0.783
Bgn	2.24051e-58	4.48103e-55	0.258488	2	0.965	0.875
Hpf1	2.84966e-58	5.69932e-55	0.409458	2	0.829	0.698
Ccnb1	1.31942e-57	2.63884e-54	0.863217	2	0.577	0.365
Pgk1	1.77457e-57	3.54914e-54	0.29985	2	0.953	0.891
Lgals1	1.86104e-57	3.72207e-54	0.389449	2	0.978	0.919
Hist1h1e	1.17166e-56	2.34332e-53	0.64818	2	0.735	0.552
Knl1	3.63048e-56	7.26096e-53	0.487806	2	0.639	0.534
Gins1	1.00329e-55	2.00659e-52	0.465477	2	0.604	0.51
Arl6ip1	1.74985e-55	3.49969e-52	0.712	2	0.959	0.877
Sapcd2	1.77915e-55	3.5583e-52	0.513797	2	0.602	0.492
Hat1	1.46106e-54	2.92212e-51	0.451729	2	0.789	0.637
Ccnd1	2.9088e-54	5.81761e-51	0.577658	2	0.865	0.776
Cenpc	7.15654e-54	1.43131e-50	0.339736	2	0.738	0.54
Pdia4	8.76179e-54	1.75236e-50	0.346629	2	0.874	0.755
Flna	1.83657e-52	3.67314e-49	0.390037	2	0.968	0.896
Spag5.1	2.35298e-52	4.70596e-49	0.394836	2	0.612	0.544
Rrm2	4.7217e-52	9.44341e-49	0.583699	2	0.559	0.261
Rad51	1.17895e-51	2.35789e-48	0.392983	2	0.572	0.38
Fbln2	2.40674e-51	4.81349e-48	0.369976	2	0.996	0.967
LOC103689961	3.86274e-50	7.72548e-47	0.395684	2	0.953	0.854
Vrk2	1.31031e-49	2.62062e-46	0.254669	2	0.684	0.54
Ckap4	3.37286e-49	6.74573e-46	0.34521	2	0.958	0.868
Col8a1	3.38365e-49	6.7673e-46	0.334471	2	0.638	0.465
Psme1	2.8079e-48	5.61579e-45	0.34796	2	0.898	0.79
Osbpl1a	1.28966e-47	2.57933e-44	0.312752	2	0.873	0.723
Ncl	1.34153e-47	2.68306e-44	0.274928	2	0.948	0.85
Rpl22l1	1.43712e-47	2.87424e-44	0.263607	2	0.998	0.984
Sgo2	2.61958e-47	5.23916e-44	0.811152	2	0.595	0.461
Phgdh	3.18994e-46	6.37987e-43	0.430418	2	0.692	0.521
Fstl1	3.62808e-46	7.25616e-43	0.313721	2	0.995	0.95
Arhgap11a	6.42925e-46	1.28585e-42	0.383497	2	0.758	0.609
Fkbp3	7.45932e-46	1.49186e-42	0.35386	2	0.938	0.895
Eno1	1.35436e-45	2.70873e-42	0.26762	2	0.943	0.911
Ybx3	1.183e-43	2.36601e-40	0.329407	2	0.865	0.789
Kif22	1.95378e-43	3.90757e-40	0.435915	2	0.777	0.674
Pak1ip1	2.13704e-43	4.27409e-40	0.282386	2	0.685	0.572
Bub1	2.85648e-43	5.71296e-40	0.930918	2	0.568	0.405
Lhfpl6	3.04863e-43	6.09725e-40	0.279375	2	0.943	0.79
Mif	1.01159e-42	2.02319e-39	0.272295	2	0.957	0.904
Cep89	1.18346e-42	2.36692e-39	0.494842	2	0.611	0.448
Blmh	1.45566e-42	2.91133e-39	0.369992	2	0.716	0.639
Fen1	8.59451e-42	1.7189e-38	0.423258	2	0.612	0.5
Ncaph	1.60283e-41	3.20565e-38	0.424915	2	0.582	0.491
Odf2	1.12361e-39	2.24721e-36	0.341249	2	0.708	0.568
Hmgn3	3.64246e-39	7.28492e-36	0.287098	2	0.987	0.907
Fus	9.36428e-39	1.87286e-35	0.379974	2	0.72	0.602
Cenpu	3.53544e-38	7.07088e-35	0.311698	2	0.536	0.311
Dkc1	1.47901e-37	2.95803e-34	0.397444	2	0.72	0.609
Amd1	1.99844e-37	3.99688e-34	0.305763	2	0.835	0.711
Eif4ebp1	4.52993e-37	9.05987e-34	0.328111	2	0.852	0.761
Lrrc59	2.12825e-36	4.25649e-33	0.387471	2	0.805	0.716
Gtse1	3.17323e-36	6.34646e-33	0.427593	2	0.664	0.555
Tedc1	3.83384e-36	7.66768e-33	0.407051	2	0.601	0.458
Abracl	4.21431e-36	8.42863e-33	0.255346	2	0.971	0.936
Rock2	4.69428e-35	9.38856e-32	0.271584	2	0.82	0.704
Gas2l3	7.70949e-35	1.5419e-31	0.351683	2	0.608	0.549
Slbp	5.49747e-34	1.09949e-30	0.424963	2	0.733	0.633
Emp3	9.17102e-34	1.8342e-30	0.324308	2	0.961	0.891
Gins4	2.07965e-33	4.15931e-30	0.488114	2	0.616	0.497
Racgap1	8.65394e-33	1.73079e-29	0.855233	2	0.569	0.493
Rangap1	5.4118e-32	1.08236e-28	0.504983	2	0.631	0.525
P4ha2	2.04691e-31	4.09383e-28	0.255676	2	0.851	0.75
Rfc5	1.16009e-30	2.32017e-27	0.477002	2	0.577	0.447
Ccn2	2.77756e-30	5.55512e-27	0.397283	2	0.908	0.82
LOC100361457	3.81131e-30	7.62262e-27	0.347465	2	0.695	0.552
Trim59	5.55609e-30	1.11122e-26	0.408794	2	0.626	0.532
Sept11	1.80045e-29	3.6009e-26	0.312467	2	0.711	0.574
Diaph3	2.26091e-29	4.52183e-26	0.60319	2	0.582	0.511
Mad2l1	6.02076e-29	1.20415e-25	0.260686	2	0.568	0.491
Lrrfip1	1.17188e-28	2.34376e-25	0.386501	2	0.624	0.486
Mdfic	1.60692e-28	3.21384e-25	0.284204	2	0.756	0.649
Egfl8	7.19484e-28	1.43897e-24	0.257899	2	0.743	0.588
Rfc3	8.54862e-28	1.70972e-24	0.665716	2	0.614	0.539
Nop56	5.57464e-27	1.11493e-23	0.391393	2	0.659	0.537
Crip1	7.73643e-27	1.54729e-23	0.397546	2	0.802	0.707
Cdc6	1.70826e-26	3.41652e-23	0.311161	2	0.548	0.453
Nefl	2.56715e-26	5.1343e-23	0.294899	2	0.643	0.519
Dbf4	1.02979e-23	2.05958e-20	0.382896	2	0.595	0.547
G2e3	1.178e-23	2.356e-20	0.292961	2	0.555	0.447
Fxn	1.19052e-22	2.38104e-19	0.253889	2	0.691	0.623
Idh2	7.13087e-22	1.42617e-18	0.294276	2	0.742	0.708
Pa2g4	1.31745e-21	2.6349e-18	0.338207	2	0.641	0.524
Trip13	2.48892e-21	4.97785e-18	0.323782	2	0.574	0.499
Mmp15	3.64463e-21	7.28926e-18	0.314422	2	0.848	0.788
Vars	3.87545e-21	7.75091e-18	0.377445	2	0.603	0.481
Nup85	2.21122e-20	4.42244e-17	0.277286	2	0.597	0.546
Rfc4	6.12542e-20	1.22508e-16	0.427547	2	0.574	0.483
Iqgap3	1.43442e-19	2.86884e-16	0.647051	2	0.55	0.537
Pithd1	1.55702e-19	3.11404e-16	0.328186	2	0.693	0.62
Ahcy	2.40305e-19	4.80609e-16	0.353525	2	0.607	0.504
Kdelr3	3.81267e-19	7.62533e-16	0.301904	2	0.79	0.738
Dnph1	4.79382e-19	9.58764e-16	0.346582	2	0.639	0.556
Kifc1	5.80546e-19	1.16109e-15	0.57205	2	0.559	0.534
Odc1	1.70464e-17	3.40928e-14	0.298382	2	0.689	0.639
Rfc2	2.15771e-17	4.31542e-14	0.439896	2	0.589	0.514
Kif11	5.08439e-17	1.01688e-13	0.79746	2	0.571	0.553
Mcm2	1.14843e-16	2.29686e-13	0.424072	2	0.583	0.515
Kif15	5.34534e-16	1.06907e-12	0.451217	2	0.547	0.508
Cdk5rap2	6.41142e-15	1.28228e-11	0.267582	2	0.623	0.499
Vrk1	1.1061e-14	2.21219e-11	0.313689	2	0.551	0.455
Atad2	6.43372e-14	1.28674e-10	0.607629	2	0.534	0.458
Tinagl1	1.16145e-13	2.32291e-10	0.41054	2	0.548	0.429
Phldb2	3.10546e-13	6.21092e-10	0.255623	2	0.52	0.396
Ezr	6.68295e-13	1.33659e-09	0.250769	2	0.626	0.522
Topbp1	1.19845e-12	2.3969e-09	0.385401	2	0.556	0.458
Nup43	1.64921e-12	3.29841e-09	0.302695	2	0.547	0.47
Hist1h1b	3.87553e-11	7.75105e-08	0.537953	2	0.456	0.288
Psmb9	7.38198e-11	1.4764e-07	0.279425	2	0.574	0.498
Dnmt1	3.58404e-10	7.16807e-07	0.428617	2	0.609	0.577
Tcf19	1.77784e-09	3.55567e-06	0.570558	2	0.553	0.519
Mcm3	7.59621e-09	1.51924e-05	0.6476	2	0.535	0.497
Cenpn	7.85357e-09	1.57071e-05	0.336582	2	0.489	0.389
Nolc1	1.62965e-08	3.2593e-05	0.250591	2	0.714	0.702
Ncapg	3.14664e-08	6.29327e-05	0.407488	2	0.489	0.332
Ska3	3.46606e-08	6.93212e-05	0.307151	2	0.504	0.432
Aurka	1.69536e-07	0.000339072	0.460529	2	0.474	0.38
Rassf1	2.24292e-07	0.000448583	0.250834	2	0.526	0.441
Lmnb1	2.56738e-07	0.000513476	0.56227	2	0.483	0.357
Pabpc4	9.46645e-06	0.0189329	0.254658	2	0.659	0.661
Rad51ap1	1.6184e-05	0.0323679	0.362787	2	0.525	0.462
Tyrobp	2.97005e-258	5.9401e-255	3.94373	3	0.998	0.492
Fcer1g	1.64282e-248	3.28563e-245	3.66489	3	0.988	0.416
C1qb	2.70453e-246	5.40906e-243	3.90456	3	0.983	0.33
C1qa	1.52441e-242	3.04882e-239	3.98087	3	0.98	0.347
Tmem176b	1.28754e-239	2.57509e-236	3.49118	3	0.975	0.445
Tmem176a	5.42431e-235	1.08486e-231	3.36462	3	0.968	0.388
Laptm5	5.84337e-231	1.16867e-227	2.33813	3	0.97	0.568
C1qc	6.57535e-230	1.31507e-226	3.18289	3	0.963	0.325
Aif1	1.08931e-229	2.17863e-226	3.03313	3	0.97	0.461
Cst3	8.35614e-229	1.67123e-225	3.49879	3	1	0.959
Csf1r	8.23019e-228	1.64604e-224	2.5588	3	0.95	0.307
Anxa3	1.34096e-225	2.68191e-222	3.39983	3	0.965	0.435
Apoe	1.65173e-222	3.30345e-219	3.87695	3	0.978	0.474
C3	1.05908e-215	2.11816e-212	1.81966	3	0.935	0.506
Ctsz	1.08427e-206	2.16855e-203	2.43623	3	0.968	0.702
Ctsb	1.71867e-206	3.43733e-203	2.2878	3	0.99	0.889
Rgs10	4.64002e-206	9.28004e-203	2.23686	3	0.96	0.555
Fyb1	3.09885e-203	6.1977e-200	1.19188	3	0.892	0.235
Adgre1	1.45524e-199	2.91049e-196	1.61122	3	0.897	0.304
Gpr183	1.91299e-198	3.82598e-195	0.596562	3	0.772	0.13
Ccl3	6.77077e-194	1.35415e-190	1.90762	3	0.907	0.472
Abi3	4.59554e-185	9.19108e-182	0.705369	3	0.838	0.261
Arhgdib	2.77043e-180	5.54087e-177	1.99336	3	0.89	0.342
Cd68	7.00346e-180	1.40069e-176	2.13351	3	0.897	0.369
Mrgprx3	1.71582e-178	3.43164e-175	0.506731	3	0.782	0.145
Coro1a	2.78852e-172	5.57704e-169	1.80844	3	0.895	0.519
Tmsb4x	1.1963e-170	2.3926e-167	0.920672	3	1	1
Bin2	3.26986e-170	6.53971e-167	1.22533	3	0.858	0.393
Irf8	1.20941e-168	2.41881e-165	0.95995	3	0.843	0.403
Fcgr3a	4.79654e-165	9.59308e-162	1.79622	3	0.865	0.343
Pld4	1.53881e-164	3.07761e-161	1.62579	3	0.873	0.35
Lyz2	2.62831e-164	5.25662e-161	2.26205	3	0.875	0.394
Il1b	3.77039e-161	7.54079e-158	0.571609	3	0.752	0.167
Nckap1l	1.36101e-156	2.72202e-153	1.07285	3	0.825	0.318
Timd2	1.55521e-156	3.11043e-153	0.276594	3	0.757	0.215
Eng	1.27807e-151	2.55613e-148	0.800777	3	0.845	0.504
Ckb	4.04556e-151	8.09111e-148	1.71907	3	0.973	0.748
Ifi30	6.49564e-151	1.29913e-147	1.74823	3	0.917	0.611
Gngt2	2.66826e-150	5.33653e-147	1.34811	3	0.838	0.391
Ctsd	1.44144e-149	2.88288e-146	1.81086	3	0.975	0.892
P2ry6	6.97524e-149	1.39505e-145	0.862735	3	0.8	0.29
Ncf1	8.22972e-149	1.64594e-145	0.982604	3	0.823	0.449
Snx20	4.83218e-148	9.66436e-145	0.501978	3	0.818	0.462
Rnaset2	6.57503e-147	1.31501e-143	1.7015	3	0.978	0.851
Tnfrsf21	1.0803e-146	2.1606e-143	0.371347	3	0.79	0.368
Casp1	7.24356e-146	1.44871e-142	0.541365	3	0.767	0.266
Was	1.05825e-140	2.1165e-137	0.734779	3	0.792	0.392
Npc2	7.23207e-140	1.44641e-136	1.30263	3	0.998	0.981
Fermt3	1.3111e-139	2.62219e-136	0.940388	3	0.795	0.337
Sgk1	5.62161e-137	1.12432e-133	0.809601	3	0.825	0.516
Lgmn	6.74748e-136	1.3495e-132	1.64457	3	0.935	0.789
Cd83	9.8344e-136	1.96688e-132	0.694415	3	0.77	0.259
Fth1	3.62598e-135	7.25196e-132	0.763779	3	1	1
Aurka	2.37373e-131	4.74746e-128	0.340953	3	0.78	0.378
Map3k8	1.87684e-130	3.75368e-127	0.380424	3	0.815	0.562
Dock8	1.06448e-128	2.12895e-125	0.844446	3	0.83	0.578
Trem2	1.21364e-127	2.42728e-124	1.83528	3	0.823	0.354
Rgs1	2.05901e-127	4.11803e-124	0.67369	3	0.802	0.536
Glipr1	1.03258e-125	2.06517e-122	0.546299	3	0.802	0.51
Plek	5.36405e-125	1.07281e-121	1.14173	3	0.81	0.509
Cxcl16	2.68765e-123	5.37529e-120	1.58944	3	0.823	0.511
Hk2	7.86797e-122	1.57359e-118	1.01475	3	0.882	0.616
Dusp6	8.04819e-121	1.60964e-117	0.76424	3	0.86	0.528
Cfh	7.30109e-120	1.46022e-116	1.79991	3	0.82	0.37
RT1-CE10	3.59729e-118	7.19458e-115	1.43387	3	0.945	0.652
Egr1	2.32533e-117	4.65066e-114	1.01171	3	0.858	0.431
Creg1	3.06737e-114	6.13473e-111	1.39007	3	0.792	0.377
Nlrp3	2.99671e-113	5.99342e-110	0.692656	3	0.74	0.251
Epsti1	3.311e-109	6.622e-106	0.828725	3	0.77	0.415
Clec4a1	1.68204e-106	3.36408e-103	0.652481	3	0.755	0.403
Hexb	1.96574e-106	3.93147e-103	1.02951	3	0.907	0.639
Etv1	3.53399e-106	7.06798e-103	0.312731	3	0.75	0.411
Apbb1ip	1.29964e-105	2.59928e-102	1.00658	3	0.807	0.457
Oasl2	3.44844e-105	6.89688e-102	0.363883	3	0.818	0.557
Zfp36	1.23186e-104	2.46371e-101	0.835699	3	0.873	0.668
Dhrs9	1.86724e-104	3.73448e-101	0.2954	3	0.705	0.234
Hmox1	7.55771e-99	1.51154e-95	1.19667	3	0.828	0.571
Timp2	2.06341e-98	4.12682e-95	1.37166	3	0.907	0.78
Rac2	2.24914e-97	4.49827e-94	1.2711	3	0.78	0.362
RT1-A2	9.73257e-95	1.94651e-91	0.946627	3	0.897	0.624
Ltc4s	2.38225e-93	4.76451e-90	0.88612	3	0.725	0.281
Igf1	1.13107e-92	2.26214e-89	1.28467	3	0.865	0.685
Pou2f2	5.90112e-92	1.18022e-88	0.919927	3	0.743	0.378
Syk	1.55055e-91	3.10111e-88	0.28594	3	0.662	0.215
Junb	1.65569e-90	3.31138e-87	1.07626	3	0.907	0.579
Ch25h	4.18635e-90	8.3727e-87	0.867893	3	0.718	0.318
Ptprc	2.7523e-89	5.50461e-86	0.818826	3	0.755	0.554
Grn	9.59023e-87	1.91805e-83	0.850017	3	0.97	0.916
Cyba	1.41832e-86	2.83663e-83	0.83641	3	0.99	0.93
Dnase2	1.71684e-86	3.43368e-83	1.33401	3	0.825	0.574
Mki67	4.77422e-86	9.54845e-83	0.747375	3	0.733	0.362
Hck	9.34799e-86	1.8696e-82	0.635376	3	0.715	0.412
Tkt	1.25765e-85	2.51529e-82	1.0215	3	0.93	0.692
Hivep3	1.58062e-85	3.16124e-82	0.295527	3	0.787	0.565
Sat1	2.01933e-85	4.03865e-82	1.15749	3	0.97	0.85
Gpr84	4.68559e-85	9.37119e-82	0.806918	3	0.715	0.317
Fam111a	1.20125e-84	2.4025e-81	0.557464	3	0.868	0.672
Itgb2	1.59841e-82	3.19681e-79	0.489959	3	0.713	0.458
Ifngr1	1.62662e-82	3.25325e-79	1.09607	3	0.877	0.657
Ptpn6	1.90551e-82	3.81102e-79	0.892973	3	0.723	0.284
Cndp2	2.05609e-82	4.11217e-79	0.997662	3	0.863	0.659
Pltp	8.28659e-82	1.65732e-78	1.51428	3	0.78	0.557
Tmem37	2.45872e-81	4.91744e-78	0.733482	3	0.74	0.46
Tacc3	4.482e-81	8.964e-78	0.383859	3	0.765	0.572
Limd2	8.32694e-81	1.66539e-77	0.999427	3	0.887	0.68
Dgkz	5.39035e-79	1.07807e-75	0.555387	3	0.833	0.543
Hcst	7.89171e-79	1.57834e-75	0.761111	3	0.672	0.194
Clec7a	2.07342e-78	4.14685e-75	0.701424	3	0.66	0.237
Cebpb	1.01944e-77	2.03887e-74	1.03527	3	0.877	0.659
Hpgds	9.50461e-76	1.90092e-72	0.624774	3	0.63	0.115
Il18	9.61641e-75	1.92328e-71	0.70406	3	0.703	0.394
Pkp4	5.43733e-74	1.08747e-70	0.397993	3	0.838	0.613
Tgfbr1	6.72337e-74	1.34467e-70	0.557602	3	0.828	0.669
Pycard	1.4537e-73	2.9074e-70	1.01472	3	0.782	0.502
Dusp1	6.32204e-73	1.26441e-69	0.982965	3	0.777	0.473
Cxcl2	8.29809e-73	1.65962e-69	0.994869	3	0.65	0.177
Ier3	5.88015e-71	1.17603e-67	1.1757	3	0.968	0.889
Hist1h1b	5.28968e-70	1.05794e-66	0.375001	3	0.685	0.291
Serpinb1a	8.06521e-70	1.61304e-66	0.474793	3	0.723	0.46
Gmfg	1.52767e-68	3.05534e-65	1.23755	3	0.787	0.61
Bcl2a1	2.00659e-68	4.01317e-65	0.870057	3	0.693	0.36
Pik3cg	5.23981e-68	1.04796e-64	0.515148	3	0.647	0.194
Cd53	1.03761e-67	2.07522e-64	0.87927	3	0.693	0.384
Sesn2	1.13417e-67	2.26834e-64	0.318435	3	0.818	0.624
Inpp5d	1.41052e-67	2.82104e-64	0.537116	3	0.647	0.225
AABR07028769.1	2.37226e-66	4.74451e-63	0.601695	3	0.812	0.639
Ucp2	4.75631e-66	9.51262e-63	0.864547	3	0.965	0.86
Cenpf	1.13841e-65	2.27683e-62	0.311695	3	0.757	0.437
Glul	5.75388e-62	1.15078e-58	1.13966	3	0.757	0.515
Rgs2	4.17271e-61	8.34541e-58	0.610289	3	0.672	0.424
Snx18	7.63049e-59	1.5261e-55	0.52581	3	0.785	0.57
Ftl1	1.43931e-56	2.87862e-53	0.488219	3	1	1
Slc11a1	4.3854e-56	8.7708e-53	0.624637	3	0.66	0.321
Arhgap9	9.91593e-56	1.98319e-52	0.479724	3	0.68	0.568
Spint2	7.99692e-53	1.59938e-49	0.771106	3	0.723	0.496
Cd37	2.38954e-52	4.77907e-49	1.01986	3	0.672	0.354
Fcgr2b	8.84667e-52	1.76933e-48	0.490857	3	0.618	0.185
C5ar1	9.64701e-52	1.9294e-48	0.502146	3	0.625	0.245
Dpp7	3.93475e-51	7.86951e-48	0.828743	3	0.9	0.784
Cmtm7	1.16691e-50	2.33381e-47	0.896578	3	0.865	0.709
Slco2b1	2.00979e-50	4.01959e-47	0.466927	3	0.59	0.148
Pf4	3.07172e-49	6.14344e-46	1.2976	3	0.662	0.328
Blnk	2.05392e-48	4.10783e-45	0.945008	3	0.662	0.399
Rpl14	2.85808e-48	5.71617e-45	0.415321	3	0.998	0.997
Zfp36l1	4.49542e-48	8.99083e-45	0.72502	3	0.927	0.815
Oplah	8.14437e-48	1.62887e-44	0.591036	3	0.708	0.573
Arsb	7.48029e-47	1.49606e-43	0.538468	3	0.745	0.59
Cd302	4.27009e-46	8.54017e-43	0.780313	3	0.748	0.651
Ctsc	5.67068e-46	1.13414e-42	0.601146	3	0.86	0.643
Gpnmb	1.44079e-45	2.88159e-42	1.79309	3	0.693	0.546
Rps5	1.60757e-45	3.21513e-42	0.414343	3	1	0.997
Fmnl1	3.88558e-45	7.77116e-42	0.429083	3	0.605	0.255
Spc24	8.66922e-45	1.73384e-41	0.275266	3	0.77	0.532
Ly86	1.73205e-43	3.4641e-40	0.916009	3	0.627	0.254
Ccl2	3.17477e-43	6.34954e-40	0.900305	3	0.772	0.593
Nfkbia	9.85186e-43	1.97037e-39	0.888704	3	0.792	0.611
Spi1	4.56846e-42	9.13693e-39	0.729608	3	0.635	0.365
Rps12	5.38234e-42	1.07647e-38	0.447298	3	1	0.995
Mafb	2.66822e-41	5.33645e-38	0.882264	3	0.632	0.32
Rpl27a	9.56606e-39	1.91321e-35	0.328845	3	1	1
Cfp	1.08411e-37	2.16822e-34	0.609875	3	0.642	0.545
Atp1b1	1.27186e-37	2.54373e-34	0.728848	3	0.713	0.691
Slc15a3	1.63318e-37	3.26636e-34	0.420521	3	0.63	0.47
Btg2	3.08997e-37	6.17995e-34	0.76278	3	0.71	0.522
Rps2	4.17658e-37	8.35316e-34	0.335164	3	1	0.999
Ccl4	5.93338e-37	1.18668e-33	0.723281	3	0.608	0.394
Ctsh	2.20881e-36	4.41763e-33	0.549923	3	0.983	0.924
Clec2l	3.70573e-36	7.41146e-33	0.698666	3	0.63	0.489
Rab32	6.07757e-36	1.21551e-32	0.387432	3	0.75	0.532
Dek	9.24921e-36	1.84984e-32	0.604106	3	0.845	0.691
Arhgap45	1.80371e-35	3.60742e-32	0.430161	3	0.608	0.365
Pa2g4	4.08251e-35	8.16502e-32	0.303947	3	0.825	0.526
Psme1	1.00298e-34	2.00597e-31	0.590612	3	0.93	0.794
Slc1a3	4.94387e-34	9.88775e-31	0.433439	3	0.723	0.495
Rpsa	5.49501e-34	1.099e-30	0.296737	3	1	0.999
Ugt1a3	2.15115e-33	4.3023e-30	0.499864	3	0.805	0.685
Rpl4	1.45975e-32	2.9195e-29	0.506534	3	0.993	0.949
Vsir	2.90983e-32	5.81966e-29	0.463622	3	0.64	0.459
Idh2	3.41204e-32	6.82408e-29	0.378156	3	0.915	0.706
Trpc6	2.76072e-31	5.52144e-28	0.26858	3	0.672	0.638
Hcls1	4.99384e-31	9.98768e-28	0.721018	3	0.618	0.433
Fam110a	6.12506e-31	1.22501e-27	0.492056	3	0.662	0.508
Sirpa	8.13336e-31	1.62667e-27	0.599926	3	0.83	0.705
Ehd4	8.24302e-31	1.6486e-27	0.492174	3	0.907	0.795
Gatm	2.25787e-30	4.51573e-27	0.448547	3	0.645	0.524
Actb	2.55306e-30	5.10611e-27	0.403128	3	0.998	0.99
Top2a	2.76742e-30	5.53484e-27	0.521842	3	0.625	0.391
Tspo	3.61022e-30	7.22045e-27	0.53848	3	0.95	0.862
Rps18l1	6.00747e-30	1.20149e-26	0.287653	3	1	0.999
Pdcd4	1.95589e-29	3.91179e-26	0.548949	3	0.782	0.713
Lcp2	2.64013e-28	5.28026e-25	0.534642	3	0.56	0.14
Tnfaip8l2	2.67277e-27	5.34555e-24	1.03321	3	0.613	0.318
Lmo2	6.42536e-27	1.28507e-23	0.589266	3	0.59	0.422
Cotl1	4.34111e-26	8.68222e-23	0.507509	3	0.853	0.789
Nrros	4.34574e-26	8.69148e-23	0.404476	3	0.547	0.294
Macf1	4.21306e-25	8.42613e-22	0.430581	3	0.892	0.728
Hnrnpa1	1.25119e-24	2.50237e-21	0.457919	3	0.968	0.852
Ms4a6a	1.45193e-24	2.90387e-21	0.302989	3	0.59	0.473
Sh3kbp1	2.45232e-24	4.90465e-21	0.337622	3	0.84	0.682
Rpl13	2.4613e-24	4.9226e-21	0.264643	3	1	0.997
Cntrl	5.33556e-24	1.06711e-20	0.250149	3	0.593	0.428
Fcgr1a	5.62245e-24	1.12449e-20	0.533325	3	0.527	0.128
LOC100359583	8.63648e-24	1.7273e-20	0.421859	3	0.993	0.986
Naaa	1.70703e-23	3.41405e-20	0.412764	3	0.578	0.426
Tmem119	3.15681e-23	6.31362e-20	0.274816	3	0.593	0.455
Rbm3	3.49731e-23	6.99463e-20	0.450117	3	0.968	0.892
Gpr34	4.3017e-23	8.6034e-20	0.432949	3	0.547	0.308
Hmgb2	1.44708e-22	2.89415e-19	0.617335	3	0.772	0.721
AABR07039356.2	2.85044e-22	5.70087e-19	0.418586	3	0.762	0.611
Arl11	1.25739e-21	2.51478e-18	0.63442	3	0.57	0.418
Sec11c	4.00223e-21	8.00446e-18	0.349043	3	0.87	0.745
AABR07044711.1	4.47555e-21	8.9511e-18	0.380454	3	0.938	0.844
Rps6ka1	1.6144e-20	3.2288e-17	0.369742	3	0.73	0.646
Tuba1c	2.04972e-20	4.09944e-17	0.513419	3	0.685	0.578
Amd1	2.99074e-20	5.98147e-17	0.416713	3	0.797	0.717
Fos	4.18717e-20	8.37433e-17	0.495184	3	0.76	0.614
Pcna	9.52588e-19	1.90518e-15	0.295834	3	0.855	0.689
Pea15	1.38636e-18	2.77272e-15	0.452329	3	0.98	0.934
Csf2ra	5.08808e-18	1.01762e-14	0.735959	3	0.69	0.654
Nfkbiz	6.4248e-18	1.28496e-14	0.333138	3	0.65	0.544
Rack1	1.27268e-17	2.54536e-14	0.27054	3	1	0.993
Tmpo	1.85245e-17	3.70491e-14	0.446796	3	0.603	0.462
Apobec1	9.72188e-17	1.94438e-13	0.451252	3	0.525	0.331
Fcrl2	2.62125e-16	5.2425e-13	0.542679	3	0.527	0.366
Dab2	4.52095e-16	9.0419e-13	0.305289	3	0.34	0.564
Tbxas1	1.15024e-15	2.30048e-12	0.465136	3	0.552	0.427
Cfd	1.31094e-15	2.62187e-12	0.295251	3	0.258	0.246
Osbpl1a	1.83614e-15	3.67229e-12	0.303214	3	0.858	0.73
AC134224.1	4.86371e-15	9.72742e-12	0.413462	3	0.932	0.761
LOC100911825	4.89077e-15	9.78153e-12	0.830108	3	0.537	0.256
Plekho1	5.31857e-15	1.06371e-11	0.277993	3	0.88	0.796
Eef1g	3.64703e-14	7.29405e-11	0.262643	3	0.99	0.968
Nell2	5.21975e-14	1.04395e-10	0.253469	3	0.495	0.266
Lpcat2	5.26136e-14	1.05227e-10	0.482828	3	0.66	0.594
Ccnd1	2.31509e-13	4.63019e-10	0.400698	3	0.79	0.781
Evi2a	2.70164e-13	5.40327e-10	0.256709	3	0.805	0.745
Hist1h1e	2.92312e-13	5.84625e-10	0.395234	3	0.713	0.56
Lcp1	9.82923e-13	1.96585e-09	0.798776	3	0.54	0.253
Aspa	1.91441e-12	3.82881e-09	0.418746	3	0.56	0.503
Rpl31	1.51713e-11	3.03426e-08	0.253863	3	0.99	0.974
LOC108351137	2.31817e-11	4.63634e-08	0.262948	3	0.932	0.825
Ctss	3.56509e-11	7.13018e-08	0.35163	3	0.292	0.191
Ctla2a	1.72369e-10	3.44738e-07	0.300636	3	0.292	0.262
Pid1	2.91286e-10	5.82571e-07	0.336973	3	0.807	0.716
Cxcl1	7.26716e-10	1.45343e-06	0.349109	3	0.335	0.459
AABR07027306.1	2.86946e-09	5.73892e-06	0.327568	3	0.512	0.411
Tlr2	2.47447e-08	4.94894e-05	0.390668	3	0.342	0.385
Lgals3bp	4.4817e-08	8.9634e-05	0.250983	3	0.782	0.688
Psmb9	5.94971e-08	0.000118994	0.325661	3	0.568	0.501
Mrc1	9.94944e-08	0.000198989	0.515275	3	0.312	0.196
Trpv2	1.08799e-07	0.000217599	0.304214	3	0.522	0.471
Fh	1.86598e-07	0.000373196	0.321024	3	0.625	0.546
Folr2	3.74774e-07	0.000749547	0.611281	3	0.485	0.294
Rarres1	7.35047e-07	0.00147009	0.651766	3	0.637	0.645
Sulf2	1.56041e-06	0.00312083	0.279971	3	0.728	0.678
Lst1	1.73405e-06	0.00346811	0.442036	3	0.322	0.265
Ccl6	8.7232e-06	0.0174464	0.345177	3	0.308	0.202
Map4k1	9.43494e-06	0.0188699	0.25575	3	0.555	0.582
Foxg1	5.71115e-110	1.14223e-106	0.618152	4	0.763	0.195
Ckb	2.54703e-99	5.09406e-96	2.68695	4	0.964	0.75
Ntrk2	2.01359e-88	4.02718e-85	1.17324	4	0.871	0.504
AABR07040095.1	1.16103e-79	2.32206e-76	0.394638	4	0.786	0.435
Tubb3	2.96227e-78	5.92455e-75	1.43538	4	0.866	0.476
Prrx1	4.59421e-76	9.18843e-73	0.593102	4	0.79	0.448
Ptn	2.61699e-71	5.23398e-68	2.12708	4	0.951	0.669
Tnfaip6	7.2679e-71	1.45358e-67	0.989689	4	0.938	0.619
Tubb4a	4.3497e-70	8.6994e-67	0.798163	4	0.902	0.645
Mbp	5.76853e-70	1.15371e-66	0.377058	4	0.812	0.549
Ptprf	7.85524e-70	1.57105e-66	0.923957	4	0.884	0.517
Gria2	8.68513e-69	1.73703e-65	1.92214	4	0.848	0.615
Rarres1	1.21359e-67	2.42718e-64	1.45809	4	0.888	0.642
Gpm6b	3.50244e-67	7.00489e-64	1.34514	4	0.96	0.701
Bgn	9.36286e-66	1.87257e-62	1.4654	4	0.973	0.879
Etv1	2.60314e-65	5.20628e-62	0.979763	4	0.781	0.414
Nacc2	4.25887e-65	8.51773e-62	1.53732	4	0.906	0.644
LOC103689961	6.09096e-65	1.21819e-61	1.09012	4	0.982	0.859
Myc	2.17851e-64	4.35702e-61	0.33887	4	0.812	0.409
Plod2	6.57403e-64	1.31481e-60	1.34449	4	0.848	0.52
Cxcl14	4.94331e-62	9.88662e-59	0.970556	4	0.741	0.242
Cd9	1.05926e-60	2.11853e-57	1.10795	4	0.982	0.758
Rcan2	1.22966e-60	2.45932e-57	0.330487	4	0.701	0.323
Faim2	4.02737e-60	8.05473e-57	0.73912	4	0.737	0.285
Sidt2	7.98867e-60	1.59773e-56	2.83298	4	0.844	0.758
Thbs2	5.59977e-59	1.11995e-55	1.47172	4	0.786	0.395
Myo5a	9.56955e-59	1.91391e-55	0.504708	4	0.835	0.493
Syt4	2.15974e-58	4.31948e-55	0.987495	4	0.795	0.59
Brinp3	5.90047e-57	1.18009e-53	0.401816	4	0.652	0.255
Frmpd1	5.91436e-57	1.18287e-53	0.420545	4	0.768	0.445
Tubb2b	1.43865e-56	2.87731e-53	1.45757	4	0.884	0.569
Rps2	1.76863e-55	3.53726e-52	0.674374	4	1	0.999
Tnfrsf21	1.95162e-55	3.90324e-52	0.500153	4	0.701	0.372
Gpr37l1	9.95481e-55	1.99096e-51	0.806922	4	0.737	0.288
Fhl1	1.97551e-54	3.95101e-51	1.05516	4	0.835	0.561
C1ql1	7.04012e-54	1.40802e-50	1.92783	4	0.777	0.465
Edil3	5.01635e-52	1.00327e-48	0.570189	4	0.763	0.536
Ly6h	1.23778e-51	2.47555e-48	0.456147	4	0.732	0.451
Plpp1	3.79478e-51	7.58956e-48	1.08794	4	0.996	0.819
Ptprz1	1.56453e-50	3.12906e-47	0.886078	4	0.804	0.382
Sema3d	3.36306e-50	6.72612e-47	0.682501	4	0.759	0.483
Nap1l5	9.41974e-50	1.88395e-46	0.259759	4	0.754	0.48
Cyp1b1	1.10101e-49	2.20203e-46	0.756678	4	0.79	0.674
Vldlr	2.6497e-49	5.2994e-46	0.301606	4	0.804	0.467
Nrxn1	1.12402e-48	2.24804e-45	0.718895	4	0.799	0.489
Stmn4	1.55201e-48	3.10402e-45	0.487084	4	0.772	0.539
Timp2	2.5916e-48	5.18321e-45	1.05517	4	0.911	0.781
Lxn	3.69903e-48	7.39806e-45	1.28419	4	0.853	0.775
Col8a1	3.80873e-48	7.61746e-45	1.64605	4	0.786	0.472
Actn1	8.03585e-48	1.60717e-44	1.8246	4	0.951	0.814
Itm2a	2.22112e-47	4.44224e-44	0.835703	4	0.821	0.633
Tmsb4x	3.69261e-47	7.38521e-44	1.10741	4	1	1
Ephb1	7.15368e-47	1.43074e-43	0.281753	4	0.696	0.423
Pim3	1.22477e-46	2.44955e-43	0.390712	4	0.808	0.529
Phyhipl	1.62947e-46	3.25895e-43	0.607532	4	0.848	0.674
Calm1	2.51179e-46	5.02358e-43	1.02554	4	0.96	0.857
Tmpo	2.54532e-46	5.09064e-43	0.322198	4	0.826	0.461
Pdlim1	1.04442e-45	2.08884e-42	0.842297	4	0.875	0.683
Prps2	1.70721e-45	3.41443e-42	0.743042	4	0.821	0.55
Pea15	2.29457e-45	4.58914e-42	0.903637	4	0.978	0.935
Stk32a	9.34955e-45	1.86991e-41	0.336853	4	0.683	0.379
Rex1bd	2.02877e-44	4.05754e-41	0.547025	4	0.786	0.543
Gng3	3.25327e-44	6.50653e-41	1.00876	4	0.737	0.558
Sept8	2.04609e-43	4.09217e-40	0.750883	4	0.933	0.759
Ext1	2.4287e-43	4.85739e-40	0.93719	4	0.879	0.616
Rock2	3.4572e-43	6.9144e-40	1.14066	4	0.938	0.709
Ptprd	5.26845e-43	1.05369e-39	0.431274	4	0.723	0.409
Mt3	8.9851e-43	1.79702e-39	1.46176	4	0.665	0.3
Slit2	1.92652e-42	3.85303e-39	1.04095	4	0.862	0.712
Gatm	2.40987e-42	4.81974e-39	0.90015	4	0.786	0.524
Adamtsl3	4.17924e-42	8.35848e-39	1.19681	4	0.728	0.39
C1qtnf5	4.9206e-42	9.84121e-39	1.41327	4	0.835	0.739
Syt11	9.45173e-42	1.89035e-38	0.965211	4	0.862	0.672
Khdrbs3	1.09299e-41	2.18599e-38	0.587643	4	0.728	0.429
Thbd	2.65747e-41	5.31494e-38	0.262194	4	0.58	0.223
Sox2	2.84949e-41	5.69898e-38	1.1211	4	0.795	0.65
Plpp3	6.48612e-41	1.29722e-37	0.499063	4	0.826	0.594
Fat1	6.5491e-41	1.30982e-37	0.973385	4	0.915	0.778
AABR07025295.1	7.24895e-41	1.44979e-37	1.12547	4	0.906	0.75
Actb	1.1361e-40	2.27219e-37	1.18155	4	0.996	0.99
Lhx2	1.3891e-40	2.7782e-37	0.695843	4	0.781	0.58
Cebpd	1.61184e-40	3.22367e-37	1.0384	4	0.812	0.558
Pcp4l1	2.29215e-40	4.5843e-37	0.620399	4	0.741	0.573
Cavin3	9.91776e-40	1.98355e-36	1.17675	4	0.92	0.762
Pla2g16	1.19367e-39	2.38735e-36	0.878997	4	0.951	0.791
Pkig	1.82197e-39	3.64395e-36	0.691747	4	0.924	0.663
Itga8	4.76368e-39	9.52736e-36	0.476999	4	0.768	0.585
Gls	7.66182e-39	1.53236e-35	0.797913	4	0.879	0.638
Junb	6.26986e-38	1.25397e-34	0.701686	4	0.866	0.582
Minar2	8.26178e-38	1.65236e-34	0.325694	4	0.638	0.318
Prkar2b	9.24403e-38	1.84881e-34	0.394244	4	0.777	0.521
Pdpn	2.69642e-37	5.39284e-34	0.80405	4	0.79	0.5
Mt1	6.62805e-37	1.32561e-33	0.611071	4	0.79	0.574
Hsph1	8.37323e-37	1.67465e-33	0.5865	4	0.888	0.589
Thrb	1.07092e-36	2.14185e-33	0.335571	4	0.719	0.546
Macf1	1.09372e-36	2.18744e-33	0.876561	4	0.906	0.729
Cpe	1.17133e-36	2.34266e-33	0.7324	4	0.929	0.788
Ctxn1	4.60275e-36	9.2055e-33	0.77306	4	0.808	0.579
LOC100911295	8.00086e-36	1.60017e-32	0.667788	4	0.978	0.811
Rab31	2.18601e-35	4.37202e-32	0.849778	4	0.938	0.834
Dusp1	1.53692e-34	3.07384e-31	0.370394	4	0.741	0.475
Eef1g	1.59551e-34	3.19101e-31	0.631196	4	0.996	0.969
Igfbp3	1.72203e-34	3.44407e-31	1.92379	4	0.92	0.786
Dipk2a	6.71975e-34	1.34395e-30	0.668103	4	0.768	0.573
Ssc5d	1.72509e-33	3.45017e-30	0.770812	4	0.701	0.552
Rhob	2.14164e-33	4.28328e-30	0.969188	4	0.853	0.689
LOC108351137	3.1215e-33	6.243e-30	0.682187	4	0.978	0.825
AABR07044711.1	9.15379e-33	1.83076e-29	0.642865	4	0.973	0.844
Vgf	3.77891e-32	7.55782e-29	1.78288	4	0.683	0.46
Hm13	4.6414e-32	9.28281e-29	0.883527	4	0.772	0.611
Hspb1	5.24543e-32	1.04909e-28	1.27861	4	0.933	0.892
Prss23	6.14132e-32	1.22826e-28	0.858198	4	0.996	0.923
Nnat	7.81942e-32	1.56388e-28	0.419333	4	0.625	0.344
Pcp4	2.96409e-31	5.92817e-28	0.377351	4	0.549	0.321
Gja1	2.99642e-31	5.99285e-28	1.04651	4	0.786	0.598
Ccdc107	3.20766e-31	6.41532e-28	0.966013	4	0.893	0.747
Nrxn2	4.71304e-31	9.42607e-28	0.334237	4	0.549	0.318
Slc12a2	5.38344e-31	1.07669e-27	0.691514	4	0.879	0.695
Clu	9.99724e-31	1.99945e-27	0.542824	4	0.741	0.584
Sept4	1.6147e-30	3.2294e-27	0.931459	4	0.701	0.489
Fos	2.13695e-30	4.27389e-27	0.734244	4	0.902	0.614
Rps20	2.61894e-30	5.23789e-27	0.467623	4	1	0.997
Map2	2.82989e-30	5.65978e-27	0.392626	4	0.848	0.567
Cavin1	2.99505e-30	5.9901e-27	0.883679	4	0.888	0.791
Fabp5	4.29756e-30	8.59513e-27	0.762381	4	0.871	0.607
Fxyd7	4.75478e-30	9.50955e-27	1.0264	4	0.674	0.428
Lats2	1.7002e-29	3.40041e-26	0.643342	4	0.897	0.766
Ppp1r14b	2.45961e-29	4.91922e-26	0.577697	4	0.991	0.948
Tmeff2	3.41046e-29	6.82091e-26	0.595597	4	0.656	0.442
Cxxc5	5.22635e-29	1.04527e-25	0.842337	4	0.817	0.674
Amotl2	7.26009e-29	1.45202e-25	0.667758	4	0.942	0.847
Npvf	1.42213e-28	2.84426e-25	2.19602	4	0.683	0.476
Nuak2	1.45877e-28	2.91755e-25	0.372339	4	0.683	0.541
Hbegf	4.47149e-28	8.94298e-25	0.955448	4	0.848	0.776
Ccn1	7.20356e-28	1.44071e-24	0.9182	4	0.906	0.765
Fmod	1.78365e-27	3.5673e-24	0.314723	4	0.652	0.501
Me1	2.40033e-27	4.80067e-24	0.435152	4	0.786	0.635
Glcci1	2.58877e-27	5.17753e-24	0.580762	4	0.79	0.645
Dmd	2.98409e-27	5.96818e-24	0.515487	4	0.732	0.6
Rgs22	3.6764e-27	7.3528e-24	0.276742	4	0.71	0.556
Lhfpl6	5.51635e-27	1.10327e-23	0.853852	4	0.853	0.799
Pou3f3	6.22027e-27	1.24405e-23	0.479377	4	0.683	0.684
Tmem150a	6.39618e-27	1.27924e-23	0.73901	4	0.696	0.447
Gucy1b1	9.79386e-27	1.95877e-23	0.487541	4	0.808	0.62
Ddah1	1.77606e-26	3.55212e-23	0.678103	4	0.942	0.927
Atp1b1	2.94616e-26	5.89233e-23	1.06488	4	0.835	0.69
Phlda1	8.31258e-26	1.66252e-22	0.981545	4	0.839	0.657
Pcdh17	9.62726e-26	1.92545e-22	0.404015	4	0.723	0.476
Calr	9.76806e-26	1.95361e-22	0.478857	4	1	0.993
Eef1b2	1.31884e-25	2.63768e-22	0.513759	4	0.991	0.965
Ifitm3	1.38076e-25	2.76151e-22	0.597415	4	0.763	0.521
Actg1	4.78483e-25	9.56965e-22	0.648486	4	0.996	0.994
Rpl27a	7.34196e-25	1.46839e-21	0.369992	4	1	1
Gadd45g	2.02066e-24	4.04131e-21	0.955917	4	0.804	0.703
Gap43	3.10753e-24	6.21505e-21	1.07703	4	0.768	0.628
Tspo	3.23249e-24	6.46498e-21	0.781925	4	0.929	0.863
Slit3	6.07746e-24	1.21549e-20	0.313381	4	0.607	0.37
Atp1b2	1.30307e-23	2.60613e-20	1.17379	4	0.701	0.573
Bnip3	1.37166e-23	2.74331e-20	0.558436	4	0.844	0.691
Rpl13	1.58656e-23	3.17313e-20	0.39324	4	1	0.997
Flna	1.61381e-23	3.22762e-20	0.63438	4	0.978	0.9
Fkbp9	2.60226e-23	5.20453e-20	0.510786	4	0.875	0.812
Cd200	3.42449e-23	6.84897e-20	0.813667	4	0.964	0.83
Hnrnpa1	3.84658e-23	7.69315e-20	0.607473	4	0.942	0.853
Rps18l1	4.51387e-23	9.02774e-20	0.396147	4	1	0.999
Clec2g	8.72785e-23	1.74557e-19	0.452968	4	0.705	0.531
Myl9	1.4804e-22	2.9608e-19	0.77514	4	0.79	0.606
Tagln	2.22963e-22	4.45925e-19	0.897992	4	0.991	0.972
Nedd9	2.60903e-22	5.21807e-19	0.683424	4	0.746	0.658
Calhm5	3.08781e-22	6.17562e-19	0.273598	4	0.665	0.508
Cald1	5.48612e-22	1.09722e-18	0.576449	4	1	0.985
Tubb6	6.68422e-22	1.33684e-18	0.491007	4	0.897	0.625
Igfbp2	6.92149e-22	1.3843e-18	0.570663	4	0.621	0.379
Pcsk6	9.63789e-22	1.92758e-18	0.39829	4	0.772	0.697
Ckap4	1.02334e-21	2.04667e-18	0.565767	4	0.911	0.873
Meis2	3.52193e-21	7.04386e-18	0.317539	4	0.585	0.302
Odc1	3.57594e-21	7.15189e-18	0.637162	4	0.786	0.641
Kif1a	5.82443e-21	1.16489e-17	0.34713	4	0.638	0.585
Eno1	6.43306e-21	1.28661e-17	0.574289	4	0.964	0.913
Cnn1	7.42395e-21	1.48479e-17	0.526281	4	0.75	0.586
Gstm3	1.32952e-20	2.65905e-17	0.691163	4	0.71	0.563
Stmn2	1.49968e-20	2.99936e-17	1.84198	4	0.786	0.715
Atp1a1	3.9548e-20	7.90959e-17	0.699528	4	0.964	0.872
Rbp1	4.48532e-20	8.97065e-17	0.764836	4	0.696	0.547
Usp53	4.67131e-20	9.34263e-17	0.610213	4	0.781	0.677
Tubb2a	4.69114e-20	9.38229e-17	0.753648	4	0.888	0.833
Rps5	8.25813e-20	1.65163e-16	0.36926	4	1	0.997
Rpsa	1.09246e-19	2.18492e-16	0.384068	4	1	0.999
Fn1	1.19913e-19	2.39826e-16	0.67951	4	0.96	0.911
Serinc5	2.50938e-19	5.01876e-16	0.273998	4	0.821	0.632
Csf1	4.17628e-19	8.35256e-16	1.04596	4	0.656	0.543
Cpxm2	9.32052e-19	1.8641e-15	0.272862	4	0.478	0.221
Rpl14	9.6444e-19	1.92888e-15	0.336571	4	1	0.997
Rplp0	1.2587e-18	2.5174e-15	0.28664	4	1	0.999
Lrrc59	1.46523e-18	2.93045e-15	0.465734	4	0.884	0.719
Egr1	2.20288e-18	4.40576e-15	0.438372	4	0.696	0.436
Reep5	2.36034e-18	4.72068e-15	0.456145	4	0.96	0.909
Nnmt	4.02824e-18	8.05648e-15	0.276326	4	0.594	0.394
Lgals1	4.25253e-18	8.50507e-15	0.651472	4	0.96	0.922
Ier5l	7.02321e-18	1.40464e-14	0.640321	4	0.728	0.551
Rbfox1	9.93219e-18	1.98644e-14	0.333826	4	0.638	0.503
Snca	1.54207e-17	3.08414e-14	0.28895	4	0.518	0.325
Nfasc	1.93188e-17	3.86377e-14	0.376983	4	0.647	0.566
Aqp4	2.68942e-17	5.37885e-14	0.380608	4	0.473	0.271
Gfap	2.69578e-17	5.39156e-14	0.86564	4	0.732	0.549
Myadm	2.72585e-17	5.4517e-14	0.657088	4	0.656	0.606
LOC100125362	2.83745e-17	5.67491e-14	0.377744	4	0.616	0.596
Dner	4.48203e-17	8.96407e-14	0.27541	4	0.656	0.569
Ogfrl1	4.9382e-17	9.8764e-14	0.380324	4	0.58	0.412
Cav1	5.57451e-17	1.1149e-13	1.27297	4	0.661	0.6
Thbs1	6.01471e-17	1.20294e-13	0.359341	4	0.737	0.608
Emid1	8.23066e-17	1.64613e-13	0.321226	4	0.683	0.59
Ramp1	8.91982e-17	1.78396e-13	0.302996	4	0.469	0.286
Sox9	1.21315e-16	2.42631e-13	1.09915	4	0.674	0.686
Cacng4	2.29614e-16	4.59229e-13	0.381339	4	0.562	0.364
F2r	4.43582e-16	8.87165e-13	0.324371	4	0.696	0.629
Rplp1	5.11658e-16	1.02332e-12	0.271552	4	1	0.999
LOC100363502	6.95357e-16	1.39071e-12	0.453207	4	0.942	0.898
Nme2	7.51488e-16	1.50298e-12	0.312678	4	1	0.999
LOC103694872	8.07894e-16	1.61579e-12	0.274887	4	0.638	0.467
Tspan6	8.77834e-16	1.75567e-12	0.401656	4	0.933	0.823
Rbm3	1.07022e-15	2.14044e-12	0.337003	4	0.955	0.893
Gas6	1.40897e-15	2.81794e-12	0.487278	4	0.906	0.769
Tanc1	1.41366e-15	2.82733e-12	0.45998	4	0.643	0.55
Tnc	1.46058e-15	2.92116e-12	0.599281	4	1	0.986
Fbln5	1.82733e-15	3.65467e-12	0.710842	4	0.656	0.623
Gldn	7.87249e-15	1.5745e-11	1.14019	4	0.786	0.764
Jam2	1.2475e-14	2.495e-11	0.506298	4	0.571	0.473
Rpl31	1.3131e-14	2.62619e-11	0.294972	4	0.996	0.974
Hopx	3.65572e-14	7.31144e-11	0.459746	4	0.607	0.544
Kdelr3	4.57096e-14	9.14192e-11	0.388761	4	0.897	0.739
Unc5c	5.78215e-14	1.15643e-10	0.559673	4	0.58	0.473
Cyp26b1	9.74829e-14	1.94966e-10	0.316432	4	0.728	0.649
Acta2	1.58966e-13	3.17932e-10	1.04691	4	0.719	0.679
Zwint	2.2308e-13	4.4616e-10	0.669054	4	0.732	0.739
Rab6b	2.28766e-13	4.57532e-10	0.35163	4	0.478	0.285
Sept11	2.3465e-13	4.69299e-10	0.284576	4	0.799	0.58
Myh10	2.44106e-13	4.88211e-10	0.795838	4	0.688	0.585
Epb41l3	3.20556e-13	6.41112e-10	0.395228	4	0.612	0.546
Ranbp1	3.4481e-13	6.8962e-10	0.269078	4	0.969	0.863
Pdia4	4.4088e-13	8.8176e-10	0.259946	4	0.884	0.761
Gria3	4.73724e-13	9.47449e-10	0.574714	4	0.598	0.461
Actn4	4.86317e-13	9.72634e-10	0.338456	4	0.973	0.921
Hif1a	4.87653e-13	9.75307e-10	0.300181	4	0.857	0.708
Scrg1	5.48103e-13	1.09621e-09	0.719593	4	0.812	0.756
Hspd1	6.96951e-13	1.3939e-09	0.362559	4	0.893	0.778
Pld3	7.41544e-13	1.48309e-09	0.332052	4	0.897	0.803
Lama5	8.02959e-13	1.60592e-09	0.308548	4	0.607	0.583
Sqor	1.44883e-12	2.89766e-09	0.50461	4	0.652	0.649
Pak1	1.72919e-12	3.45838e-09	0.396391	4	0.826	0.728
Hmgn3	1.74028e-12	3.48055e-09	0.269829	4	0.946	0.912
Fzd1	1.81556e-12	3.63112e-09	0.390786	4	0.795	0.742
Col6a2	1.95516e-12	3.91033e-09	0.384151	4	0.616	0.56
Pgam1	2.31214e-12	4.62429e-09	0.343862	4	0.902	0.828
Cend1	3.30507e-12	6.61014e-09	0.44713	4	0.594	0.578
Cemip	3.56281e-12	7.12561e-09	0.335572	4	0.576	0.497
Ybx3	3.5903e-12	7.1806e-09	0.394156	4	0.862	0.793
Metrn	4.11912e-12	8.23823e-09	0.279098	4	0.862	0.748
Acta1	5.02744e-12	1.00549e-08	0.40116	4	0.683	0.665
Mgarp	5.80539e-12	1.16108e-08	0.447687	4	0.625	0.597
Mfge8	8.14073e-12	1.62815e-08	0.655719	4	0.634	0.629
Pdlim5	8.24751e-12	1.6495e-08	0.33807	4	0.835	0.719
Id3	1.06113e-11	2.12227e-08	0.281088	4	0.969	0.96
Hspb6	2.21441e-11	4.42883e-08	0.406198	4	0.665	0.582
Pls3	3.27136e-11	6.54272e-08	0.391428	4	0.808	0.727
Hexb	3.85974e-11	7.71948e-08	0.487783	4	0.696	0.643
Nrtn	3.90797e-11	7.81594e-08	0.521179	4	0.638	0.587
RGD1560394	4.04338e-11	8.08676e-08	0.35539	4	0.647	0.547
Rab32	4.10947e-11	8.21894e-08	0.347534	4	0.629	0.535
Gstm1	6.56177e-11	1.31235e-07	0.777227	4	0.643	0.557
Cryab	8.11039e-11	1.62208e-07	0.396744	4	0.996	0.976
Id2	1.08326e-10	2.16653e-07	0.612312	4	0.763	0.69
Tmed3	1.17451e-10	2.34902e-07	0.255752	4	0.862	0.825
Ctnnal1	1.25501e-10	2.51001e-07	0.360363	4	0.643	0.57
Myh11	1.61947e-10	3.23893e-07	0.330033	4	0.585	0.547
Ehd2	1.67279e-10	3.34558e-07	0.256874	4	0.536	0.428
Galnt13	2.15463e-10	4.30925e-07	0.440194	4	0.621	0.511
Ccn3	7.44648e-10	1.4893e-06	0.669053	4	0.795	0.755
Slc20a1	7.94101e-10	1.5882e-06	0.285774	4	0.643	0.585
Gsn	8.01516e-10	1.60303e-06	0.286151	4	0.737	0.609
Fbn1	8.33665e-10	1.66733e-06	0.361937	4	0.603	0.534
Slc6a6	1.11463e-09	2.22927e-06	0.742157	4	0.71	0.713
Map7d2	1.21706e-09	2.43413e-06	0.307939	4	0.661	0.627
Peg3	1.60868e-09	3.21736e-06	0.303885	4	0.737	0.678
Ppp2r2b	3.46083e-09	6.92167e-06	0.410043	4	0.683	0.645
Bok	3.95506e-09	7.91012e-06	0.405102	4	0.562	0.463
Tnn	4.19138e-09	8.38277e-06	0.692767	4	0.594	0.579
Glul	4.55836e-09	9.11671e-06	0.298469	4	0.603	0.518
Sulf1	8.37249e-09	1.6745e-05	0.298438	4	0.321	0.53
Cdkn1a	8.80149e-09	1.7603e-05	0.804543	4	0.683	0.711
Mgmt	1.5661e-08	3.1322e-05	0.482617	4	0.679	0.675
Rps12	1.97263e-08	3.94527e-05	0.251536	4	0.996	0.995
Hmox1	2.07518e-08	4.15036e-05	0.474284	4	0.616	0.575
Tmem176b	2.77189e-08	5.54378e-05	0.482493	4	0.549	0.454
Sulf2	2.89881e-08	5.79763e-05	0.415863	4	0.643	0.679
Sat1	3.38027e-08	6.76054e-05	0.416973	4	0.924	0.852
Ddx39a	4.16669e-08	8.33337e-05	0.31917	4	0.607	0.483
Tpm1	4.80192e-08	9.60385e-05	0.433656	4	0.991	0.981
Wnt5a	5.0752e-08	0.000101504	0.258865	4	0.531	0.435
Cited2	1.43387e-07	0.000286774	0.408753	4	0.871	0.821
RGD1305645	1.7621e-07	0.000352419	0.506376	4	0.795	0.782
Tuba1a	2.36433e-07	0.000472866	0.343024	4	1	0.996
Sorbs2	2.58494e-07	0.000516989	0.31441	4	0.924	0.884
Mgst3	2.64623e-07	0.000529246	0.344672	4	0.79	0.74
Slc1a1	3.17166e-07	0.000634333	0.332042	4	0.607	0.549
Has2	3.389e-07	0.000677801	0.266912	4	0.665	0.675
Ly6e	3.89564e-07	0.000779127	0.351515	4	0.679	0.614
Map1b	4.75913e-07	0.000951826	0.279804	4	0.969	0.907
Mybl1	8.08895e-07	0.00161779	0.68943	4	0.571	0.524
Sc5d	9.15239e-07	0.00183048	0.265004	4	0.754	0.739
Cacybp	1.00592e-06	0.00201185	0.314666	4	0.857	0.82
Nxph1	2.08445e-06	0.0041689	0.395595	4	0.607	0.579
Htra1	2.23194e-06	0.00446388	0.306478	4	0.75	0.729
Tent5a	3.74995e-06	0.00749989	0.411258	4	0.562	0.544
Pfkfb3	4.63263e-06	0.00926526	0.567737	4	0.634	0.59
Anxa1	7.48683e-06	0.0149737	0.448882	4	0.705	0.72
Vcam1	1.31377e-05	0.0262754	0.260647	4	0.388	0.257
Ctnnd2	1.54551e-05	0.0309102	0.260002	4	0.661	0.598
Arl4a	1.70748e-05	0.0341496	0.42612	4	0.545	0.511
Inpp5j	1.75349e-05	0.0350698	0.272781	4	0.536	0.558
Slc25a15	2.33109e-05	0.0466217	0.350564	4	0.558	0.505
